# Supplementary material
Source: Research Square preprint supplement (doi:10.21203/rs.3.rs-9921710/v1)

## checkCIF/PLATON report

Structure factors have been supplied for datablock(s) exp\_10598\_auto

THIS REPORT IS FOR GUIDANCE ONLY. IF USED AS PART OF A REVIEW PROCEDURE FOR PUBLICATION, IT SHOULD NOT REPLACE THE EXPERTISE OF AN EXPERIENCED CRYSTALLOGRAPHIC REFEREE.

No syntax errors found.      CIF dictionary      Interpreting this report

### Datablock: exp\_10598\_auto

---

Bond precision:      C-C = 0.0024 Å      Wavelength=1.54184

Cell:                      a=9.1546(1)                      b=15.8727(2)                      c=17.7781(2)  
                              alpha=82.390(1)                      beta=86.872(1)                      gamma=87.372(1)  
Temperature:              296 K

|                        | Calculated             | Reported     |
|------------------------|------------------------|--------------|
| Volume                 | 2554.79(5)             | 2554.79(5)   |
| Space group            | P -1                   | P -1         |
| Hall group             | -P 1                   | -P 1         |
| Moiety formula         | C61 H43 N3 [+ solvent] | C61 H43 N3   |
| Sum formula            | C61 H43 N3 [+ solvent] | C61 H43 N3   |
| Mr                     | 817.98                 | 817.98       |
| Dx, g cm <sup>-3</sup> | 1.063                  | 1.063        |
| Z                      | 2                      | 2            |
| Mu (mm <sup>-1</sup> ) | 0.472                  | 0.472        |
| F000                   | 860.0                  | 860.0        |
| F000'                  | 862.26                 |              |
| h, k, lmax             | 11, 20, 22             | 11, 20, 22   |
| Nref                   | 10933                  | 10450        |
| Tmin, Tmax             | 0.954, 0.954           | 0.879, 1.000 |
| Tmin'                  | 0.954                  |              |

Correction method= # Reported T Limits: Tmin=0.879 Tmax=1.000  
AbsCorr = MULTI-SCAN

Data completeness= 0.956      Theta(max)= 77.929

|                               |                   |
|-------------------------------|-------------------|
| R(reflections)= 0.0532( 8635) | wR2(reflections)= |
| S = 1.056                     | 0.1726( 10450)    |
| Npar= 604                     |                   |

---

The following ALERTS were generated. Each ALERT has the format

**test-name\_ALERT\_alert-type\_alert-level.**

Click on the hyperlinks for more details of the test.

---

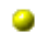

### Alert level C

PLAT094\_ALERT\_2\_C Ratio of Maximum / Minimum Residual Density .... 2.69 Report  
PLAT220\_ALERT\_2\_C NonSolvent Resd 1 C Ueq(max)/Ueq(min) Range 3.1 Ratio  
PLAT222\_ALERT\_3\_C NonSolvent Resd 1 H Uiso(max)/Uiso(min) Range 5.0 Ratio  
PLAT230\_ALERT\_2\_C Hirshfeld Test Diff for C01Q --C01R . 5.3 s.u.  
PLAT906\_ALERT\_3\_C Large K Value in the Analysis of Variance ..... 2.208 Check  
PLAT911\_ALERT\_3\_C Missing FCF Refl Between Thmin & STh/L= 0.600 19 Report  
-1 1 0, -9 -8 7, -8 10 9, -3 17 9, 2 18 9, 7 13 11,  
-7 10 12, -2-13 13, 2-13 13, 8 -5 13, 8 -4 13, 8 -3 13,  
-3 15 13, 8 -3 14, 8 -2 14, 8 3 14, 7 -4 15, 7 -3 16,  
7 1 17,

---

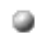

### Alert level G

PLAT003\_ALERT\_2\_G Number of Uiso or Uij Restrained non-H Atoms ... 64 Report  
PLAT072\_ALERT\_2\_G SHELXL First Parameter in WGHT Unusually Large 0.10 Report  
PLAT154\_ALERT\_1\_G The s.u.'s on the Cell Angles are Equal ..(Note) 0.001 Degree  
PLAT177\_ALERT\_4\_G The CIF-Embedded .res File Contains DELU Records 1 Report  
PLAT192\_ALERT\_3\_G A Non-default DELU Restraint Value for SecondPar 0.0200 Report  
PLAT333\_ALERT\_2\_G Large Aver C6-Ring C-C Dist C006 -C00H . 1.44 Ang.  
PLAT606\_ALERT\_4\_G Solvent Accessible VOID(S) in Structure ..... ! Info  
PLAT720\_ALERT\_4\_G Number of Unusual/Non-Standard Labels ..... 107 Note  
N001 N002 N003 C004 C005 C006 C007 C008  
C009 C00A C00B C00C C00D C00E C00F C00G  
C00H C00I H00I C00J C00K H00K C00L C00M  
C00N H00N C00O C00P C00Q H00Q C00R H00R  
C00S H00S C00T H00T C00U H00U C00V C00W  
C00X H00X C00Y C00Z H00Z C010 C011 H011  
C012 H012 C013 C014 H014 C015 C016 H016  
C017 H017 C018 C019 H019 C01A H01A C01B  
C01C H01C C01D H01D C01E H01E C01F H01F  
C01G H01G C01H H01H C01I C01J C01K H01B  
H01I H01J C01L H01L C01M H01M C01N H01K  
H01N H01O C01O H01P C01P H01Q H01R H01S  
C01Q H01T C01R H01U C01S H015 H00J H00Y  
H01V H01W H01X  
PLAT860\_ALERT\_3\_G Number of Least-Squares Restraints ..... 193 Note  
PLAT868\_ALERT\_4\_G ALERTS Due to the Use of \_smtbx\_masks Suppressed ! Info  
PLAT912\_ALERT\_4\_G Missing # of FCF Reflections Above STh/L= 0.600 463 Note  
PLAT933\_ALERT\_2\_G Number of HKL-OMIT Records in Embedded .res File 1 Note  
-1 1 0,  
PLAT941\_ALERT\_3\_G Average HKL Measurement Multiplicity ..... 3.2 Low  
PLAT969\_ALERT\_5\_G The 'Henn et al.' R-Factor-gap value ..... 4.14 Note  
Predicted wR2: Based on SigI\*\*2 4.17 or SHELX Weight 16.84  
PLAT978\_ALERT\_2\_G Number C-C Bonds with Positive Residual Density. 3 Info  
PLAT992\_ALERT\_5\_G Repd & Actual \_reflns\_number\_gt Values Differ by 9 Check

---

0 **ALERT level A** = Most likely a serious problem - resolve or explain

0 **ALERT level B** = A potentially serious problem, consider carefully

6 **ALERT level C** = Check. Ensure it is not caused by an omission or oversight

16 **ALERT level G** = General information/check it is not something unexpected

1 ALERT type 1 CIF construction/syntax error, inconsistent or missing data  
8 ALERT type 2 Indicator that the structure model may be wrong or deficient  
6 ALERT type 3 Indicator that the structure quality may be low  
5 ALERT type 4 Improvement, methodology, query or suggestion  
2 ALERT type 5 Informative message, check

---

It is advisable to attempt to resolve as many as possible of the alerts in all categories. Often the minor alerts point to easily fixed oversights, errors and omissions in your CIF or refinement strategy, so attention to these fine details can be worthwhile. In order to resolve some of the more serious problems it may be necessary to carry out additional measurements or structure refinements. However, the purpose of your study may justify the reported deviations and the more serious of these should normally be commented upon in the discussion or experimental section of a paper or in the "special\_details" fields of the CIF. checkCIF was carefully designed to identify outliers and unusual parameters, but every test has its limitations and alerts that are not important in a particular case may appear. Conversely, the absence of alerts does not guarantee there are no aspects of the results needing attention. It is up to the individual to critically assess their own results and, if necessary, seek expert advice.

### **Publication of your CIF in IUCr journals**

A basic structural check has been run on your CIF. These basic checks will be run on all CIFs submitted for publication in IUCr journals (*Acta Crystallographica*, *Journal of Applied Crystallography*, *Journal of Synchrotron Radiation*); however, if you intend to submit to *Acta Crystallographica Section C* or *E* or *IUCrData*, you should make sure that full publication checks are run on the final version of your CIF prior to submission.

### **Publication of your CIF in other journals**

Please refer to the *Notes for Authors* of the relevant journal for any special instructions relating to CIF submission.

---

**PLATON version of 06/01/2024; check.def file version of 05/01/2024**

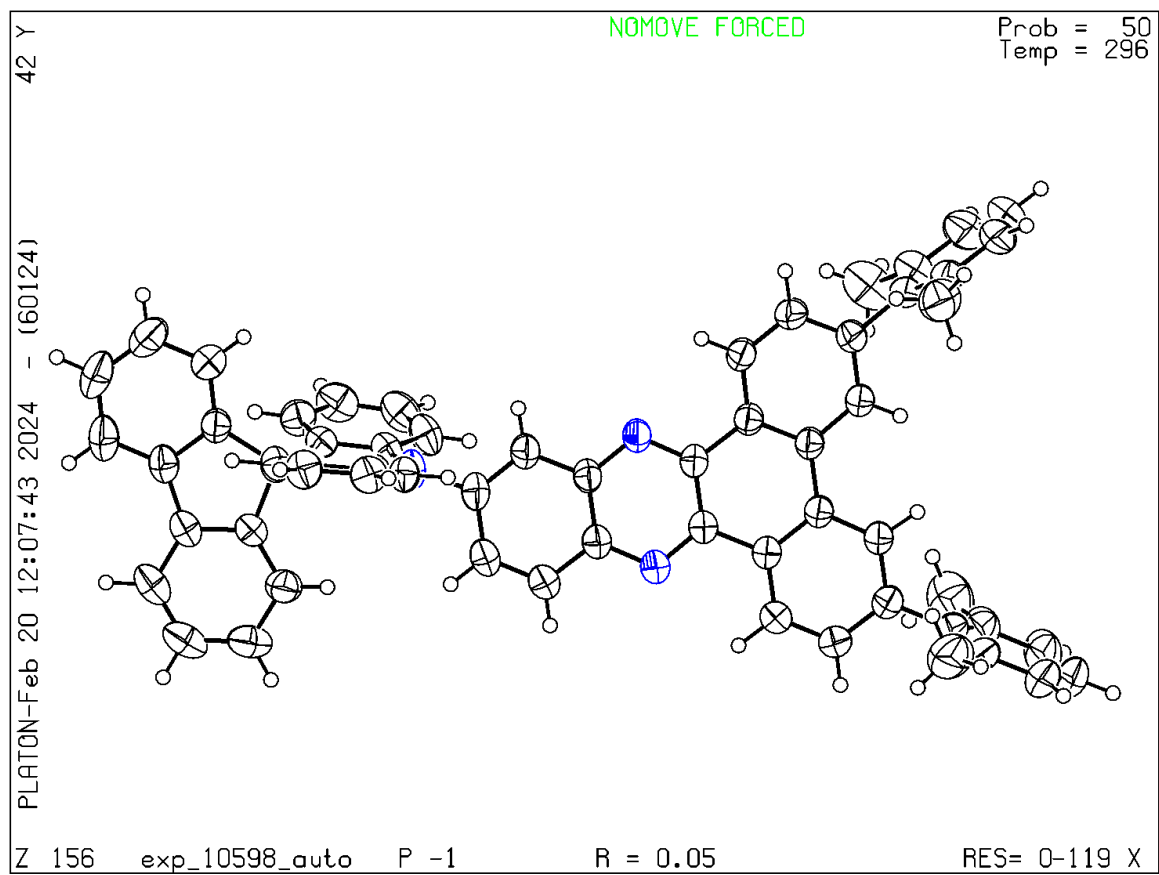

Supplement: Supplementary file 4 [file SAF-36MXBP-checkcif.pdf › SAF-36MXBP-checkcif.pdf]
