# Supplementary material
Source: Research Square preprint supplement (doi:10.21203/rs.3.rs-9921710/v1)

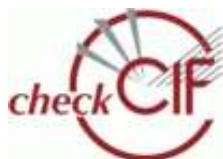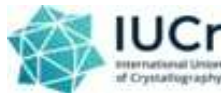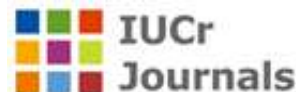

## checkCIF/PLATON report

Structure factors have been supplied for datablock(s) cu\_20230927\_DZKD\_ZHY\_0m\_a

THIS REPORT IS FOR GUIDANCE ONLY. IF USED AS PART OF A REVIEW PROCEDURE FOR PUBLICATION, IT SHOULD NOT REPLACE THE EXPERTISE OF AN EXPERIENCED CRYSTALLOGRAPHIC REFEREE.

No syntax errors found.      CIF dictionary      Interpreting this report

### Datablock: cu\_20230927\_DZKD\_ZHY\_0m\_a

---

|                 |                                                   |                                                 |              |
|-----------------|---------------------------------------------------|-------------------------------------------------|--------------|
| Bond precision: | C-C = 0.0050 Å                                    | Wavelength=1.54178                              |              |
| Cell:           | a=36.234 (3)                                      | b=8.6361 (7)                                    | c=36.862 (3) |
|                 | alpha=90                                          | beta=117.064 (5)                                | gamma=90     |
| Temperature:    | 150 K                                             |                                                 |              |
|                 | Calculated                                        | Reported                                        |              |
| Volume          | 10271.8 (15)                                      | 10271.7 (16)                                    |              |
| Space group     | P 21/n                                            | P 1 21/n 1                                      |              |
| Hall group      | -P 2yn                                            | -P 2yn                                          |              |
| Moiety formula  | 4 (C59 H41 N5), 4 (C6 H14),<br>H2 Cl2 [+ solvent] | C 2 (C59 H41 N5), 2 (C6 H14),<br>0.5 (C H2 Cl2) |              |
| Sum formula     | C261 H222 Cl2 N20 [+<br>solvent]                  | C130.5 H111 Cl1 N10                             |              |
| Mr              | 3709.49                                           | 1854.85                                         |              |
| Dx, g cm-3      | 1.199                                             | 1.199                                           |              |
| Z               | 2                                                 | 4                                               |              |
| Mu (mm-1)       | 0.770                                             | 0.770                                           |              |
| F000            | 3924.0                                            | 3936.9                                          |              |
| F000'           | 3935.50                                           |                                                 |              |
| h, k, lmax      | 43, 10, 44                                        | 43, 10, 43                                      |              |
| Nref            | 18389                                             | 18110                                           |              |
| Tmin, Tmax      | 0.955, 0.962                                      | 0.633, 0.753                                    |              |
| Tmin'           | 0.857                                             |                                                 |              |

Correction method= # Reported T Limits: Tmin=0.633 Tmax=0.753

AbsCorr = NONE

Data completeness= 0.985

Theta(max)= 67.140

R(reflections)= 0.0815( 11664)

wR2(reflections)=  
0.2148( 18110)

S = 0.985

Npar= 1461

---

The following ALERTS were generated. Each ALERT has the format

**test-name\_ALERT\_alert-type\_alert-level.**

Click on the hyperlinks for more details of the test.

---

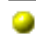

#### Alert level C

PLAT260\_ALERT\_2\_C Large Average Ueq of Residue Including C11\_9 0.143 Check  
PLAT260\_ALERT\_2\_C Large Average Ueq of Residue Including C11\_10 0.171 Check  
PLAT340\_ALERT\_3\_C Low Bond Precision on C-C Bonds ..... 0.00498 Ang.  
PLAT722\_ALERT\_1\_C Angle Calc 111(7), Rep 109.50 Dev... 1.50 Degree  
H6C\_8 -C6\_8 -H6A\_8 1\_555 1\_555 1\_555 # 538 Check  
PLAT906\_ALERT\_3\_C Large K Value in the Analysis of Variance ..... 5.346 Check  
PLAT906\_ALERT\_3\_C Large K Value in the Analysis of Variance ..... 2.022 Check  
PLAT911\_ALERT\_3\_C Missing FCF Refl Between Thmin & STh/L= 0.598 274 Report  
11 8 0, 12 8 0, 28 6 0, 36 0 0, -39 0 1, -35 0 1,  
-34 5 1, -11 8 1, -10 9 1, -9 10 1, 9 10 1, 35 4 1,  
-36 0 2, -29 7 2, -13 8 2, -12 8 2, -11 8 2, -10 9 2,  
-10 10 2, -2 0 2, 0 0 2, 8 10 2, 29 6 2, -39 2 3,  
-38 3 3, -35 0 3, -20 9 3, -10 9 3, -10 10 3, 34 4 3,  
( 244 More NOT listed: see .ckf listing file)

---

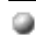

#### Alert level G

PLAT002\_ALERT\_2\_G Number of Distance or Angle Restraints on AtSite 40 Note  
PLAT003\_ALERT\_2\_G Number of Uiso or U(i,j) Restrained non-H-Atoms 22 Report  
PLAT041\_ALERT\_1\_G Calc. and Reported SumFormula Strings Differ Please Check  
Calc: C261 H222 Cl2 N20  
Rep.: C130.5 H111 Cl1 N10  
PLAT042\_ALERT\_1\_G Calc. and Reported MoietyFormula Strings Differ Please Check  
Calc: 4(C59 H41 N5), 4(C6 H14), C H2 Cl2  
Rep.: 2(C59 H41 N5), 2(C6 H14), 0.5(C H2 Cl2)  
PLAT045\_ALERT\_1\_G Calculated and Reported Z Differ by a Factor ... 0.500 Check  
PLAT073\_ALERT\_1\_G H-atoms ref., but hydrogen treatment Reported as constr Check  
PLAT083\_ALERT\_2\_G SHELXL Second Parameter in WGHT Unusually Large 17.36 Why ?  
PLAT172\_ALERT\_4\_G The CIF-Embedded .res File Contains DFIX Records 2 Report  
PLAT175\_ALERT\_4\_G The CIF-Embedded .res File Contains SAME Records 4 Report  
PLAT178\_ALERT\_4\_G The CIF-Embedded .res File Contains SIMU Records 2 Report  
PLAT186\_ALERT\_4\_G The CIF-Embedded .res File Contains ISOR Records 1 Report  
PLAT187\_ALERT\_4\_G The CIF-Embedded .res File Contains RIGU Records 1 Report  
PLAT301\_ALERT\_3\_G Main Residue Disorder .....(Resd 1) 13% Note  
PLAT302\_ALERT\_4\_G Anion/Solvent/Minor-Residue Disorder (Resd 4) 100% Note  
PLAT302\_ALERT\_4\_G Anion/Solvent/Minor-Residue Disorder (Resd 5) 100% Note  
PLAT302\_ALERT\_4\_G Anion/Solvent/Minor-Residue Disorder (Resd 6) 100% Note  
PLAT302\_ALERT\_4\_G Anion/Solvent/Minor-Residue Disorder (Resd 7) 100% Note

```

PLAT304_ALERT_4_G Non-Integer Number of Atoms in ..... (Resd 4) 10.54 Check
PLAT304_ALERT_4_G Non-Integer Number of Atoms in ..... (Resd 5) 9.46 Check
PLAT304_ALERT_4_G Non-Integer Number of Atoms in ..... (Resd 6) 1.65 Check
PLAT304_ALERT_4_G Non-Integer Number of Atoms in ..... (Resd 7) 0.85 Check
PLAT333_ALERT_2_G Large Aver C6-Ring C-C Dist C9_2 -C14_2 . 1.44 Ang.
PLAT333_ALERT_2_G Large Aver C6-Ring C-C Dist C9_1 -C14_1 . 1.44 Ang.
PLAT432_ALERT_2_G Short Inter X...Y Contact N2_2 ..C1_9 . 2.98 Ang.
                                     x,y,z = 1_555 Check
PLAT432_ALERT_2_G Short Inter X...Y Contact C25_1 ..C34A_2 . 3.19 Ang.
                                     x,y,z = 1_555 Check
PLAT605_ALERT_4_G Largest Solvent Accessible VOID in the Structure 70 A**3
PLAT769_ALERT_4_G CIF Embedded Explicitly Supplied Scattering Data 4 Note
PLAT779_ALERT_4_G Suspect or Irrelevant (Bond) Angle(s) in CIF ... 15.30 Deg.
                C23A_-C19_2-C23_2 1_555 1_555 1_555 ..... # 265 Check
PLAT860_ALERT_3_G Number of Least-Squares Restraints ..... 1467 Note
PLAT868_ALERT_4_G ALERTS Due to the Use of _smtbx_masks Suppressed ! Info
PLAT909_ALERT_3_G Percentage of I>2sig(I) Data at Theta(Max) Still 37% Note
PLAT910_ALERT_3_G Missing FCF Reflection(s) Below Theta(Min) [Deg]= 2.32 Note
                -1 0 1,
PLAT948_ALERT_5_G Externally Supplied Scattering Factors CIF 4 Note
PLAT969_ALERT_5_G The 'Henn et al.' R-Factor-gap value ..... 4.472 Note
                Predicted wR2: Based on SigI**2 4.80 or SHELX Weight 21.80 Note
PLAT978_ALERT_2_G Number C-C Bonds with Positive Residual Density. 1 Info
PLAT983_ALERT_1_G The Cl-f"= 0.7036 Deviates from IT-Value = 0.7018 Check
PLAT992_ALERT_5_G Repld & Actual _reflns_number_gt Values Differ by -12 Check

```

---

```

0 ALERT level A = Most likely a serious problem - resolve or explain
0 ALERT level B = A potentially serious problem, consider carefully
7 ALERT level C = Check. Ensure it is not caused by an omission or oversight
37 ALERT level G = General information/check it is not something unexpected

6 ALERT type 1 CIF construction/syntax error, inconsistent or missing data
10 ALERT type 2 Indicator that the structure model may be wrong or deficient
8 ALERT type 3 Indicator that the structure quality may be low
17 ALERT type 4 Improvement, methodology, query or suggestion
3 ALERT type 5 Informative message, check

```

---

## Validation response form

Please find below a validation response form (VRF) that can be filled in and pasted into your CIF.

```

# start Validation Reply Form
_vrf_PLAT260_cu_20230927_DZKD_ZHY_0m_a
;
PROBLEM: Large Average Ueq of Residue Including C11_9 0.143 Check
RESPONSE: ...
;
_vrf_PLAT340_cu_20230927_DZKD_ZHY_0m_a
;
PROBLEM: Low Bond Precision on C-C Bonds ..... 0.00498 Ang.
RESPONSE: ...
;
_vrf_PLAT722_cu_20230927_DZKD_ZHY_0m_a
;
PROBLEM: Angle Calc 111(7), Rep 109.50 Dev... 1.50 Degree

```

```
RESPONSE: ...
;
_vrf_PLAT906_cu_20230927_DZKD_ZHY_0m_a
;
PROBLEM: Large K Value in the Analysis of Variance ..... 5.346 Check
RESPONSE: ...
;
_vrf_PLAT911_cu_20230927_DZKD_ZHY_0m_a
;
PROBLEM: Missing FCF Refl Between Thmin & STh/L= 0.598 274 Report
RESPONSE: ...
;
# end Validation Reply Form
```

---

It is advisable to attempt to resolve as many as possible of the alerts in all categories. Often the minor alerts point to easily fixed oversights, errors and omissions in your CIF or refinement strategy, so attention to these fine details can be worthwhile. It is up to the individual to critically assess their own results and, if necessary, seek expert advice.

---

**PLATON version of 23/04/2026; check.def file version of 30/03/2026**

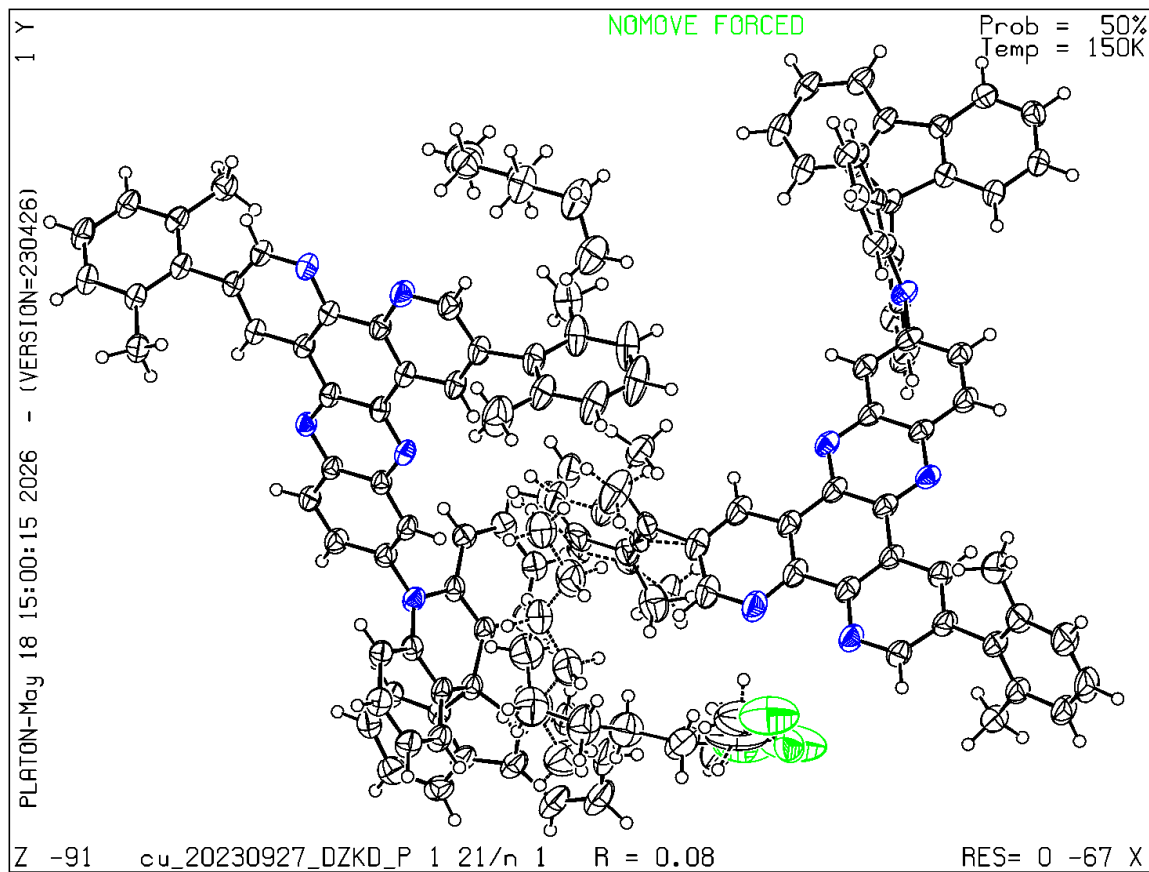

Supplement: Supplementary file 2 [file SAF-27MXNP-checkcif.pdf › SAF-27MXNP-checkcif.pdf]
