# Supplementary material
Source: Research Square preprint supplement (doi:10.21203/rs.3.rs-9921710/v1)
Supplement: Supplementary file 1 [file 516f68a2843e3663279aae4e.docx]

**Supplementary Information**

**Design of Horizontally Oriented Emitters through Three-Dimensional Geometric Analysis Enabling OLEDs with 40% Efficiency**

*Heng-Yuan Zhang, Hao Zhuo, Jing-Long Chen, Wen-Xin Xiang, Xiao-Yang Du, Hui Wang, Hui Lin, Si-Lu Tao, Cai-Jun Zheng* and Xiao-Hong Zhang*

**Synthesis**

As the subsequent sterically hindered Suzuki reaction between phenanthroline and m-xylene necessitated a strong base that could compromise the quinone structure, the quinone of phenanthroline was protected by the addition reaction1.

**Synthesis of 5,10-dibromo-2,2-dimethyl-[1,3]dioxolo[4,5-f][1,10]phenanthroline (1)**

To a 250 mL round bottom flask 3,8-dibromo-1,10-phenanthroline-5,6-dione (2.72 mmol, 1.0 g) and Na2CO3 (2.7 mmol, 288 mg) were added. 2-Nitropropane (272 mmol, 24.2 g) was added to the mixture under nitrogen atmosphere. A solution of 160 ml ACN:H2O (1:1) was added prior to being heated to 90 ℃ and stirred for 24 h under nitrogen atmosphere. The reaction was detected by TLC. Water and dichloromethane were added for extraction subsequent to the reaction system was cooled to room temperature. The organic layer was dried with anhydrous magnesium sulfate. After being concentrated by rotary evaporation, the residual solid was purified by column chromatography and recrystallisation to give a yellow powder (925.6 mg, yield 83%). 1H NMR (400 MHz, Chloroform-*d*) δ 9.03 (d, *J* = 2.3 Hz, 2H), 8.40 (d, *J* = 2.3 Hz, 2H), 1.86 (s, 6H). MALDI-TOF-MS: m/z: calculated for C15H10Br2N2O2: 409.9089, found: 410.1127.

**Synthesis of 5,10-bis(2,6-dimethylphenyl)-2,2-dimethyl-[1,3]dioxolo[4,5-f][1,10]phenanthroline (2)**

The solid reactants intermediate 1 (860 mg, 2.1 mmol), (2,6-dimethylphenyl)boronic acid (945 mg, 6.3 mmol), Ba(OH)2‧8H2O (3.8g, 8.4 mmol) and tetrakis(triphenylphosphine)palladium (115 mg, 0.1 mmol) were sequentially added to a 100 mL flask. 30 mL DME:H2O (9:1) was added into the mixture with the protection of N2. The was heated to 100 ℃ under nitrogen atmosphere and stirred for 12 hours. After cooling to room temperature, the reaction mixture was concentrated by rotary evaporation, and the residual solid was purified by column chromatography and recrystallisation to give a lime-green powder (608 mg, yield 63%). 1H NMR (600 MHz, Methylene Chloride-*d*2) δ 8.84 (d, *J* = 2.2 Hz, 2H), 8.08 (d, *J* = 2.2 Hz, 2H), 7.25 (dd, *J* = 8.4, 6.8 Hz, 2H), 7.20 (d, *J* = 7.2 Hz, 4H), 2.10 (s, 12H), 1.87 (s, 6H). MALDI-TOF-MS: m/z: calculated for C31H28N2O2: 460.2151, found: 461.5104.

**Synthesis of 10-(2,7-bis(2,6-dimethylphenyl)dipyrido[3,2-a:2',3'-c]phenazin-11-yl)-10H-spiro[acridine-9,9'-fluorene] (SAF-27MXNP)**

Intermediate 2 (368 mg, 0.8 mmol) was added into a 50 mL round bottom flask. 10 mL concentrated HNO3 was added dropwise at 0 ℃ under N2. The reaction was stirred at room temperature for 10 min. Subsequently, ice water was added and yellow precipitate was observed. The mixture was filtrated using a Büchner funnel. The filter cake was washed with water. The yellow solid obtained after drying was used directly in the next reaction without further purification. Intermediate 3 (250 mg, 0.6 mmol) and 4-(10H-spiro[acridine-9,9'-fluoren]-10-yl)benzene-1,2-diamine (262.2 g, 0.6 mmol), which was synthesized according a to previous report, were added to a 100 mL double-necked round-bottom flask. 20 mL *n*-Butanol was added to the mixture and heated to 120 °C and refluxed with stirring overnight under nitrogen. After cooling to room temperature, the reaction mixture was concentrated by rotary evaporation, and the residual solid was purified by column chromatography and recrystallisation to give an orange powder (364 mg, yield 74%). 1H NMR (400 MHz, Methylene Chloride-*d*2) δ 9.61 (dd, *J* = 21.6, 2.2 Hz, 2H), 9.14 (dd, *J* = 6.3, 2.1 Hz, 2H), 8.68 (d, *J* = 8.9 Hz, 1H), 8.57 (d, *J* = 2.3 Hz, 1H), 8.03 (dd, *J* = 9.0, 2.3 Hz, 1H), 7.89 – 7.83 (m, 2H), 7.53 – 7.38 (m, 4H), 7.36 – 7.21 (m, 8H), 6.93 (ddd, *J* = 8.6, 7.1, 1.6 Hz, 2H), 6.61 (t, *J* = 7.4 Hz, 2H), 6.46 (ddd, *J* = 21.6, 8.0, 1.4 Hz, 4H), 2.20 (d, *J* = 12.8 Hz, 12H). 13C NMR (101 MHz, Methylene Chloride-*d*2) δ 156.74, 153.91, 144.29, 143.45, 142.77, 142.72, 142.38, 141.48, 139.82, 138.06, 138.01, 137.05, 137.01, 134.86, 134.57, 133.40, 132.63, 128.95, 128.81, 128.78, 128.36, 128.26, 128.18, 127.92, 127.86, 126.04, 125.75, 121.57, 120.67, 115.37, 57.31, 21.47, 21.44. MALDI-TOF-MS: m/z: calculated for [M−1H]− (M: C59H41N5): 818.3362, found: 818.4022.

**Synthesis of 6,9-dibromo-2,2-dimethyl-[1,3]dioxolo[4,5-f][1,10]phenanthroline (4)**

The synthetic procedures were similar with those of intermediate 1, only to replace 3,8-dibromo-1,10-phenanthroline-5,6-dione with 2,9-dibromo-1,10-phenanthroline-5,6-dione and the reaction temperature was 60 ℃. Yellow solid: 1.14 g, yield 91%. 1H NMR (600 MHz, Methylene Chloride-*d*2) δ 8.11 (d, *J* = 8.5 Hz, 2H), 7.76 (d, *J* = 8.5 Hz, 2H), 1.86 (s, 6H). MALDI-TOF-MS: m/z: calculated for C15H10Br2N2O2: 409.9089, found: 410.1420.

**Synthesis of 6,9-bis(2,6-dimethylphenyl)-2,2-dimethyl-[1,3]dioxolo[4,5-f][1,10]phenanthroline (5)**

The synthetic procedures were similar with those of intermediate 2, only to replace intermediate 1 with intermediate 4. Lime-green solid: 842.6 mg, yield 74%. 1H NMR (600 MHz, Methylene Chloride-*d*2) δ 8.33 (d, *J* = 8.3 Hz, 2H), 7.56 (d, *J* = 8.3 Hz, 2H), 7.20 (t, *J* = 7.6 Hz, 2H), 7.12 (d, *J* = 7.6 Hz, 4H), 2.07 (s, 12H), 1.92 (s, 6H). MALDI-TOF-MS: m/z: calculated for C31H28N2O2: 460.2151, found: 461.5719.

**Synthesis of 10-(3,6-bis(2,6-dimethylphenyl)dipyrido[3,2-a:2',3'-c]phenazin-11-yl)-10H-spiro[acridine-9,9'-fluorene] (****SAF-36MXNP)**

The synthetic procedures were similar with those of SAF-27MXNP, only to replace intermediate 3 with intermediate 6. Orange solid: 410 mg, yield 81%. 1H NMR (600 MHz, Methylene Chloride-*d*2) δ 9.87 – 9.74 (m, 2H), 8.77 (dt, *J* = 8.8, 1.8 Hz, 1H), 8.67 (q, *J* = 2.1 Hz, 1H), 8.07 (dq, *J* = 8.7, 2.1 Hz, 1H), 7.89 (dd, *J* = 7.7, 2.8 Hz, 2H), 7.87 – 7.74 (m, 2H), 7.53 (dd, *J* = 7.6, 2.8 Hz, 2H), 7.45 (tdd, *J* = 7.5, 2.6, 1.3 Hz, 2H), 7.36 (tdd, *J* = 7.3, 2.6, 1.3 Hz, 2H), 7.22 (dtd, *J* = 45.4, 7.3, 2.4 Hz, 6H), 6.97 (ddd, *J* = 8.9, 7.3, 2.1 Hz, 2H), 6.70 – 6.61 (m, 2H), 6.60 – 6.52 (m, 2H), 6.46 (dd, *J* = 7.9, 2.4 Hz, 2H), 2.17 (d, *J* = 9.1 Hz, 12H). 13C NMR (151 MHz, Methylene Chloride-*d*2) δ 163.43, 163.41, 156.90, 149.16, 149.11, 144.34, 143.33, 142.83, 142.68, 142.33, 141.57, 140.86, 140.84, 139.87, 136.45, 136.44, 134.67, 134.61, 134.38, 133.42, 132.70, 128.99, 128.72, 128.71, 128.39, 128.27, 128.24, 128.23, 127.96, 126.50, 126.43, 126.24, 126.10, 125.74, 121.60, 120.71, 115.46, 57.36, 20.77, 20.75. MALDI-TOF-MS: m/z: calculated for [M−1H]− (M: C59H41N5): 818.3362, found: 818.3159.

**Synthesis of 4,4'-(2,2-dimethyl-3a,11b-dihydro-[1,3]dioxolo[4,5-f][1,10]phenanthroline-6,9-diyl)bis(3,5-dimethylbenzonitrile) (7)**

The synthetic procedures were similar with those of intermediate 2, only to replace intermediate 1 with intermediate 4 and (2,6-dimethylphenyl)boronic acid with (4-cyano-2,6-dimethylphenyl)boronic acid. Dark-yellow solid: 510 mg, yield 57%. 1H NMR (400 MHz, Chloroform-*d*) δ 8.40 (dd, *J* = 8.4, 1.0 Hz, 2H), 7.56 (dd, *J* = 8.4, 1.0 Hz, 2H), 7.41 (s, 4H), 2.17 (s, 12H), 1.94 (s, 6H). MALDI-TOF-MS: m/z: calculated for [M-1H]- (M: C33H28N4O2): 512.2212, found: 511.6188.

**Synthesis of 4,4'-(11-(10H-spiro[acridine-9,9'-fluoren]-10-yl)dipyrido[3,2-a:2',3'-c]phenazine-3,6-diyl)bis(3,5-dimethylbenzonitrile) (****SAF-36CNNP)**

The synthetic procedures were similar with those of SAF-27MXNP, only to replace intermediate 3 with intermediate 8. Red solid: 440 mg, yield 85%. 1H NMR (600 MHz, Methylene Chloride-*d*2) δ 9.88 (d, *J* = 8.1 Hz, 1H), 9.83 (d, *J* = 8.2 Hz, 1H), 8.79 (d, *J* = 8.8 Hz, 1H), 8.68 (d, *J* = 2.2 Hz, 1H), 8.09 (dd, *J* = 8.8, 2.3 Hz, 1H), 7.89 (d, *J* = 7.5 Hz, 2H), 7.79 (dd, *J* = 19.5, 8.1 Hz, 2H), 7.55 – 7.44 (m, 8H), 7.36 (td, *J* = 7.4, 1.1 Hz, 2H), 6.97 (ddd, *J* = 8.5, 7.1, 1.6 Hz, 2H), 6.65 (ddd, *J* = 8.1, 7.1, 1.1 Hz, 2H), 6.55 (dd, *J* = 8.5, 1.1 Hz, 2H), 6.47 (dd, *J* = 7.9, 1.5 Hz, 2H), 2.20 (d, *J* = 10.0 Hz, 12H). 13C NMR (151 MHz, Methylene Chloride-*d*2) δ 161.46, 161.44, 156.86, 149.38, 149.33, 145.35, 145.33, 144.46, 143.60, 142.94, 142.45, 142.10, 141.52, 139.87, 138.20, 138.19, 135.05, 135.01, 134.71, 133.46, 132.75, 131.85, 131.84, 128.99, 128.41, 128.31, 127.95, 127.10, 127.04, 126.07, 125.78, 125.65, 121.65, 120.73, 119.47, 115.41, 112.49, 57.34, 20.67, 20.65. MALDI-TOF-MS: m/z: calculated for [M-1H]- (M: C59H41N5): 868.3267, found: 868.4340.

**Synthesis of 6,9-dibromo-2,2-dimethylphenanthro[9,10-d][1,3]dioxole (9)**

The synthetic procedures were similar with those of intermediate 1, only to replace 3,8-dibromo-1,10-phenanthroline-5,6-dione with 3,6-dibromophenanthrene-9,10-dione and the reaction temperature was 60 ℃. Light green solid: 1.05 g, yield 89%. 1H NMR (400 MHz, Chloroform-*d*) δ 8.73 – 8.63 (m, 2H), 7.81 – 7.61 (m, 4H), 1.84 (s, 6H). MALDI-TOF-MS: m/z: calculated for [M-1H]- (M: C17H12Br2O2): 407.9184, found: 408.2042.

**Synthesis of 6,9-bis(2,6-dimethylphenyl)-2,2-dimethylphenanthro[9,10-d][1,3]dioxole (10)**

The synthetic procedures were similar with those of intermediate 2, only to replace intermediate 1 with intermediate 9. Light green solid: 930 mg, yield 83%. 1H NMR (400 MHz, Chloroform-*d*) δ 8.40 – 8.35 (m, 2H), 7.99 (d, *J* = 8.2 Hz, 2H), 7.47 – 7.41 (m, 2H), 7.21 – 7.10 (m, 6H), 2.06 (d, *J* = 0.7 Hz, 12H), 1.94 – 1.87 (m, 6H). MALDI-TOF-MS: m/z: calculated for [M−1H]− (M: C33H30O2): 458.2246, found: 458.5788.

**Synthesis of** **10-(3,6-bis(2,6-dimethylphenyl)dibenzo[a,c]phenazin-11-yl)-10H-spiro[acridine-9,9'-fluorene] (SAF-36MXBP)**

The synthetic procedures were similar with those of SAF-27MXNP, only to replace intermediate 3 with intermediate 11. Yellow solid: 320 mg, yield 88%. 1H NMR (600 MHz, Methylene Chloride-*d*2) δ 9.57 (d, *J* = 8.1 Hz, 1H), 9.52 (d, *J* = 8.1 Hz, 1H), 8.72 (d, *J* = 8.7 Hz, 1H), 8.62 (d, *J* = 2.2 Hz, 1H), 8.40 (dd, *J* = 3.3, 1.5 Hz, 2H), 7.99 (dd, *J* = 8.8, 2.2 Hz, 1H), 7.89 (d, *J* = 7.6 Hz, 2H), 7.64 (ddd, *J* = 21.2, 8.1, 1.5 Hz, 2H), 7.54 (d, *J* = 7.5 Hz, 2H), 7.45 (td, *J* = 7.4, 1.1 Hz, 2H), 7.36 (td, *J* = 7.4, 1.2 Hz, 2H), 7.26 – 7.13 (m, 6H), 6.97 (ddd, *J* = 8.5, 7.0, 1.5 Hz, 2H), 6.63 (ddd, *J* = 8.0, 7.0, 1.2 Hz, 2H), 6.58 (dd, *J* = 8.5, 1.1 Hz, 2H), 6.46 (dd, *J* = 7.9, 1.5 Hz, 2H), 2.14 (d, *J* = 10.6 Hz, 12H). 13C NMR (151 MHz, Methylene Chloride-*d*2) δ 156.94, 144.54, 144.52, 144.00, 143.79, 143.42, 142.52, 142.51, 141.89, 141.86, 141.68, 139.86, 136.44, 136.42, 133.44, 133.25, 133.15, 133.11, 132.50, 130.07, 130.05, 129.45, 129.37, 128.99, 128.35, 128.17, 128.03, 128.01, 127.99, 127.97, 127.95, 127.17, 127.12, 126.14, 125.66, 124.46, 121.45, 120.67, 115.53, 57.39, 21.29, 21.27. MALDI-TOF-MS: m/z: calculated for [M−1H]− (M: C61H43N3): 816.3457, found: 816.3688.

Figs. and Tables

Fig. S1 The synthetic route of SAF-27MXNP, SAF-36MXNP, SAF-36CNNP and SAF-36MXBP.


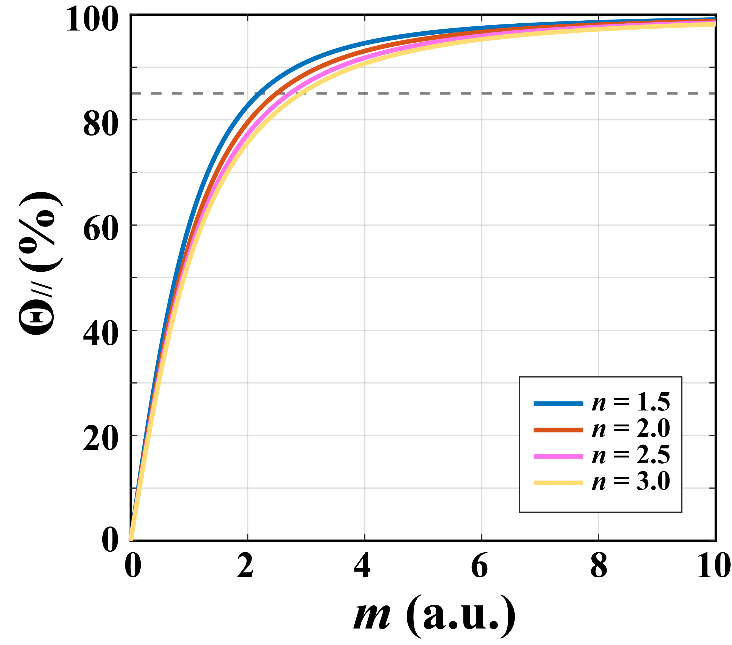


Fig. S2. Calculated Θ//-*m* curves at different *n* values using Equation 1.

To evaluate the probability that the cuboid finally lands on either of the two YZ faces, the solid angle subtended by a single YZ face is calculated. Taking the centroid as the origin, one YZ face is located at X = *Lx*/2, with coordinates (*Lx*/2, *u*, *v*). The infinitesimal solid angle is

Thus, the solid angle of one YZ face is

Because the two equivalent YZ faces, then


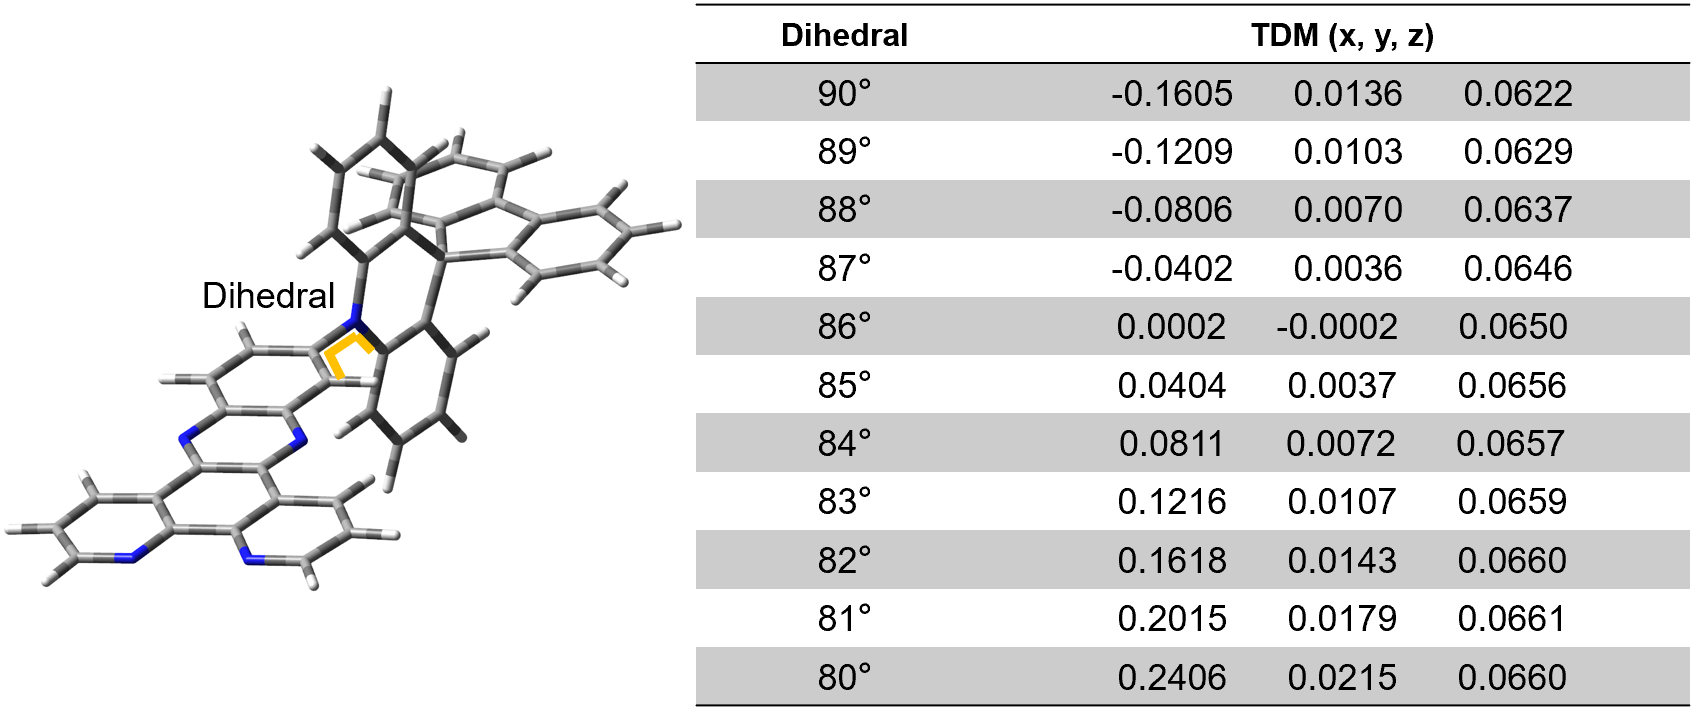


**Fig. S3.** TDM vectors of SAF-2NP under different donor-acceptor dihedral angles.

For an electric-dipole-allowed transition *i*→*j*, the transition dipole moment (TDM) is defined as . When one NTO pair dominates, the transition can be viewed as density flowing from the hole to the electron orbital. The direction of the net charge displacement (i.e., the vector connecting the centroids of the hole and electron NTO densities) then coincides with the TDM direction. In highly twisted TADF emitters, the orbital overlap is extremely small and the TDM magnitude becomes extremely small, making the Cartesian TDM components numerically unreliable; however, the direction of charge redistribution can be captured by the NTO hole→electron displacement. Therefore, we represent the TDM direction by the line connecting the centroids of the hole and electron NTOs obtained from the same TD-DFT calculation.

Taking SAF-2NP as an example, a flexible potential surfaces scanning of the donor-acceptor dihedral angle was performed, followed by excited-state calculations. The x component of the TDM vector changes markedly with the dihedral angle. It is nearly zero at 86° but increases to 0.24 at 80°, indicating a direction change from almost perpendicular to the acceptor plane to horizontal orientation.


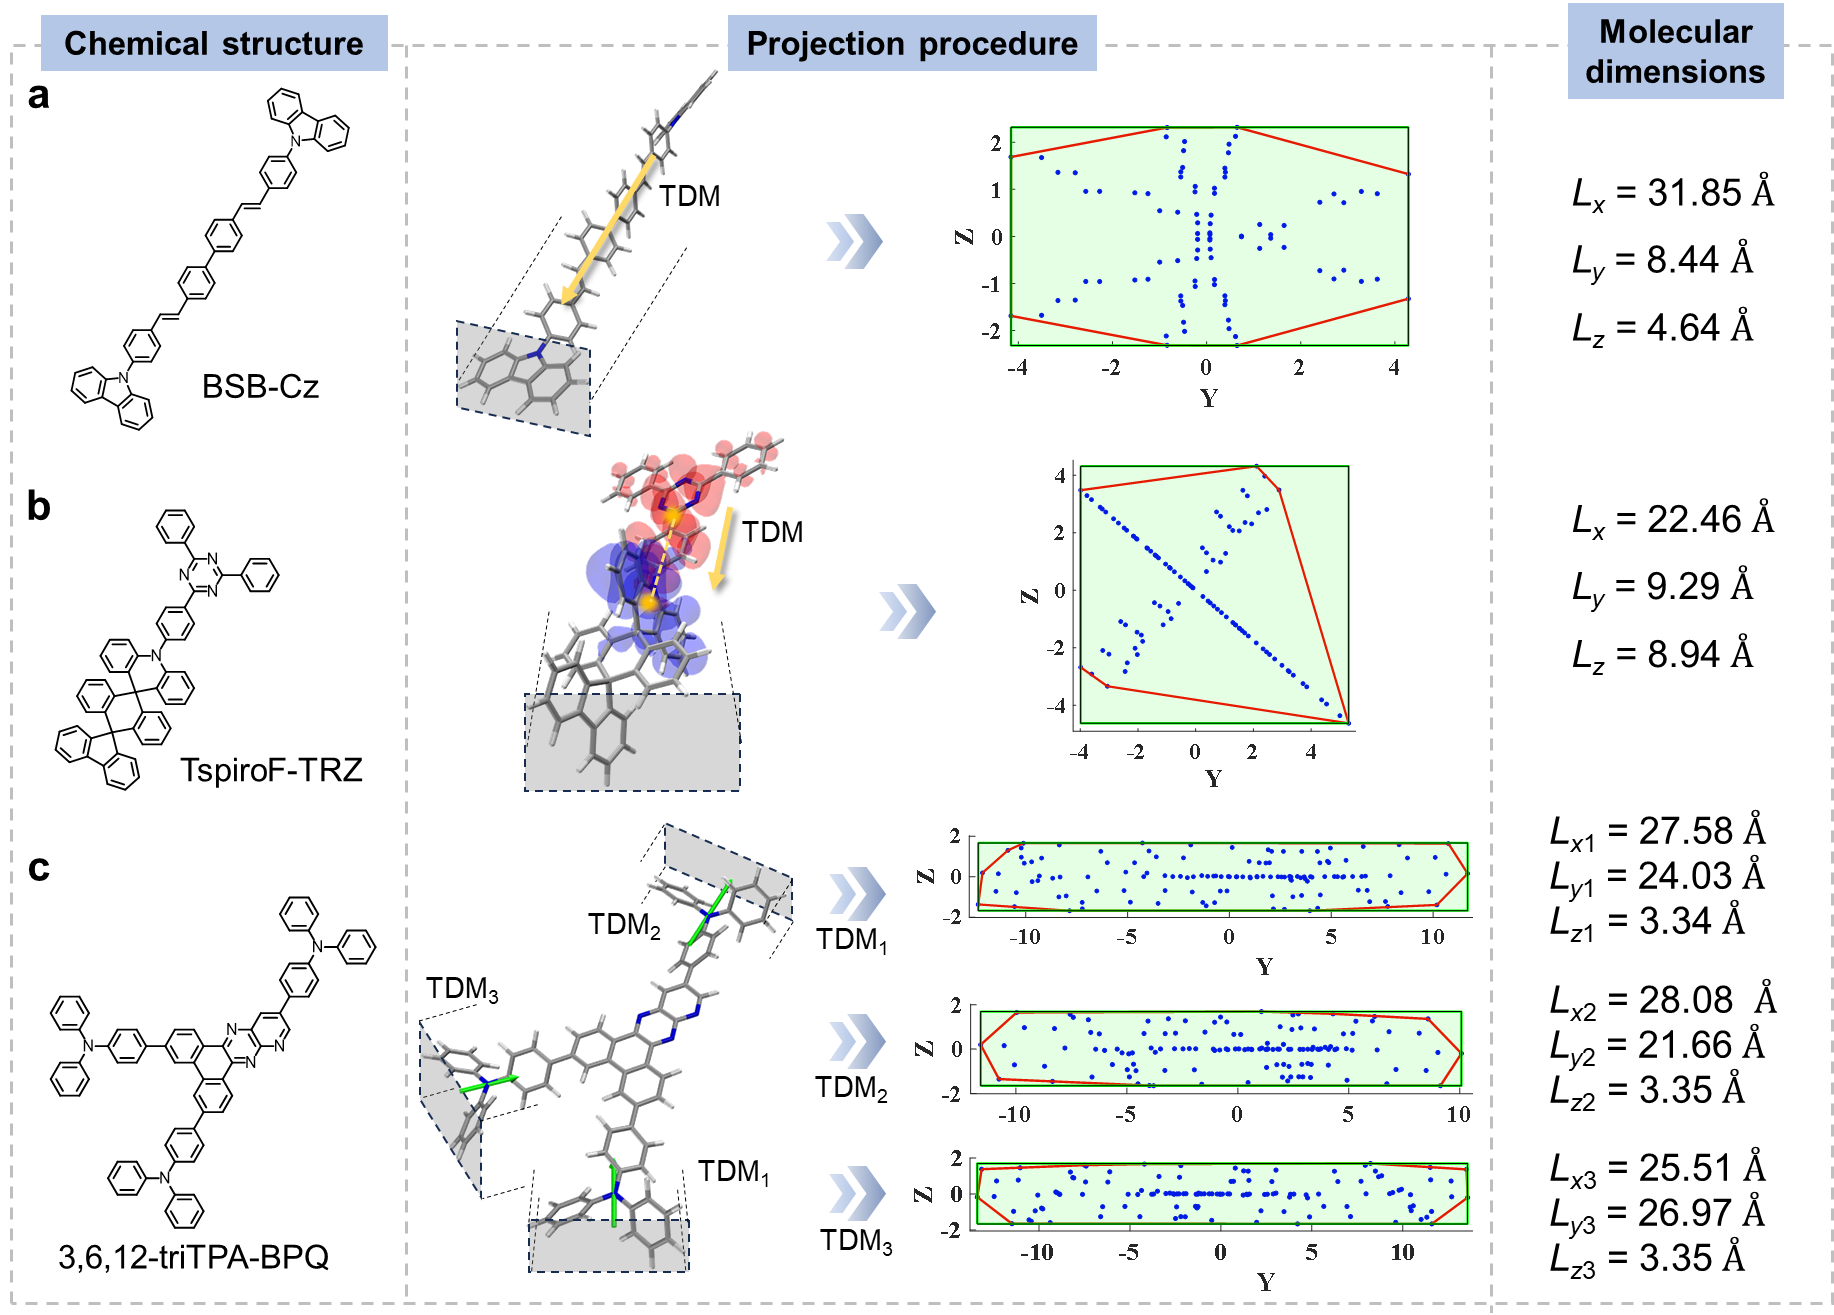


**Fig. S4.** Illustration of projection procedures of different types of emitters. (a) BSB-Cz. (b) TspiroF-TRZ. (c) 3,6,12-triTPA-BPQ. TspiroF-TRZ is an example with minimal TDM vectors (yellow dots: orbital centroids; blue: hole distribution; red: electron distribution). 3,6,12-triTPA-BPQ stands for emitters with multiple CT pathways.

**Table S1.** Decomposed TDM vectors of emitters with multiple intramolecular pathways, the corresponding geometric parameters and Θ// values.

| Compound | *Lx*  (Å) | *Ly*  (Å) | *Lz*  (Å) | *m* | Θ//  (%) |
| --- | --- | --- | --- | --- | --- |
| 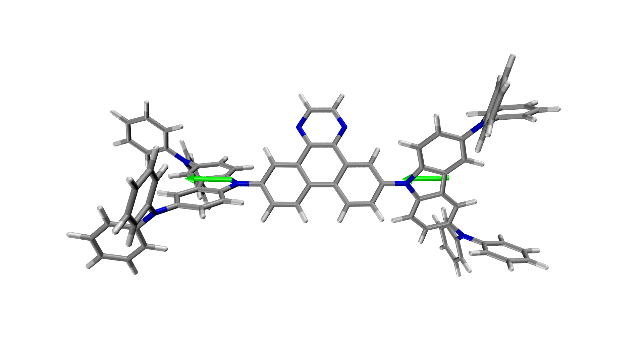  DQBC | 26.82 | 17.10 | 11.00 | 2.44 | 92 |
| 26.82 | 17.10 | 11.00 | 2.44 |
| 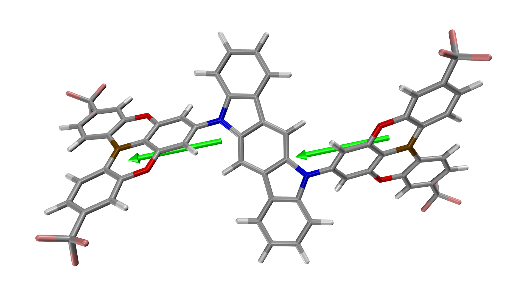  2BOICz | 22.80 | 13.00 | 10.39 | 2.19 | 91.6 |
| 22.80 | 13.00 | 10.40 | 2.19 |
| 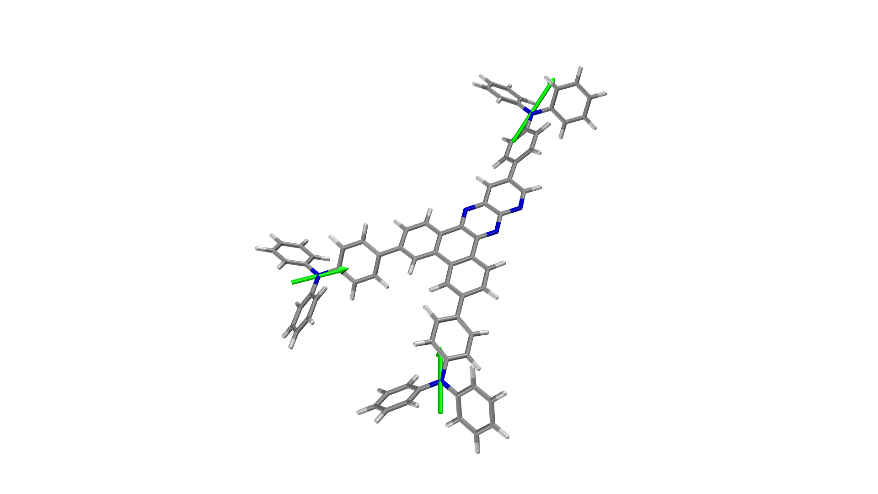  3,6,12-triTPA-BPQ | 27.58 | 24.03 | 3.34 | 27.58 | 92 |
| 28.08 | 21.66 | 3.35 | 8.38 |
| 25.51 | 26.97 | 3.35 | 7.61 |
| 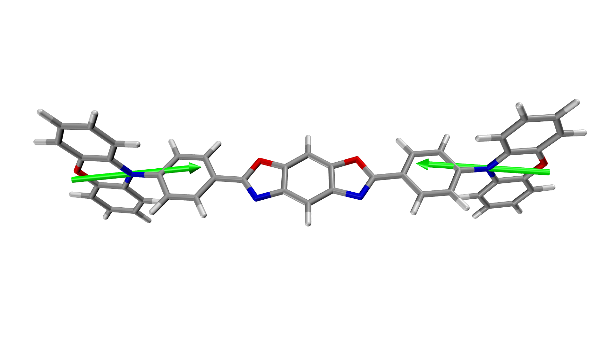  cis-BOX2 | 25.46 | 9.41 | 5.52 | 4.61 | 94 |
| 25.46 | 9.41 | 5.52 | 4.61 |
| 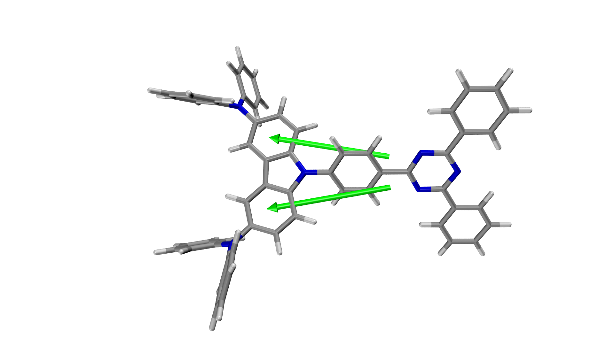  DACT-II | 20.89 | 16.57 | 8.74 | 2.39 | 88 |
| 20.89 | 16.57 | 8.74 | 2.39 |
| 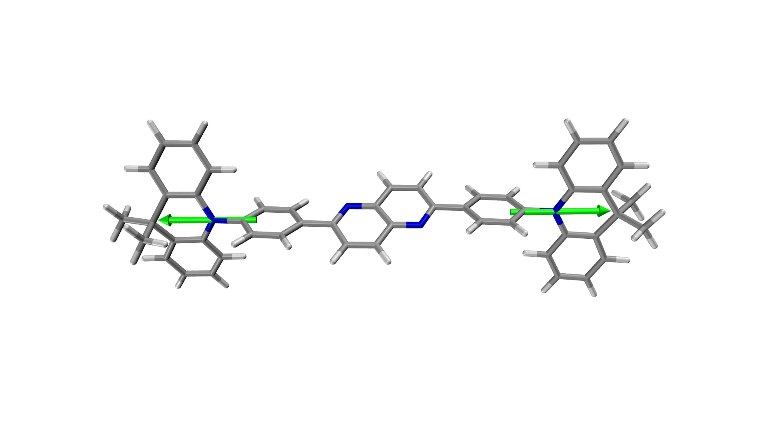  NyDPAc | 25.69 | 9.01 | 4.92 | 5.22 | 92 |
| 25.66 | 7.71 | 5.89 | 4.36 |
| 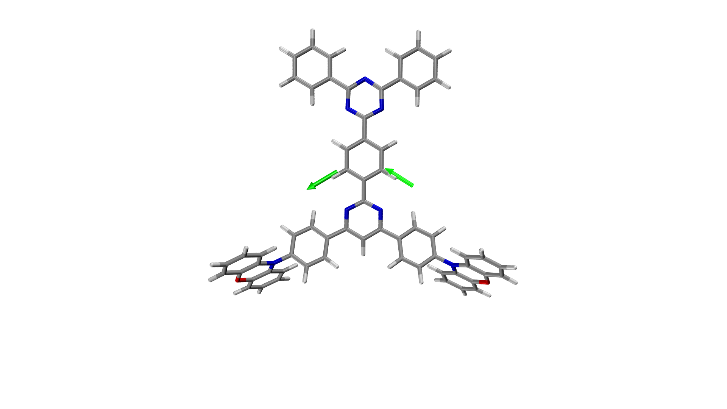  PXZTAZPM | 22.12 | 22.92 | 8.20 | 2.70 | 86 |
| 22.14 | 22.93 | 8.22 | 2.69 |
| 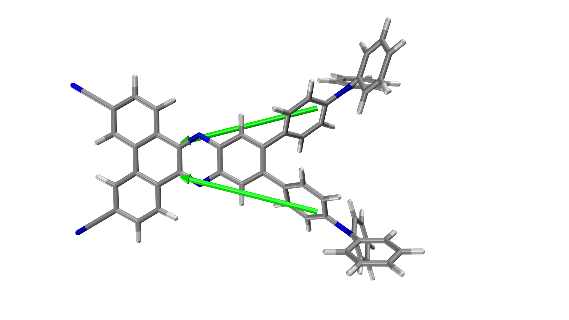  TPA-PZCN | 20.54 | 15.25 | 9.17 | 2.24 | 88 |
| 20.54 | 15.25 | 9.17 | 2.24 |
| 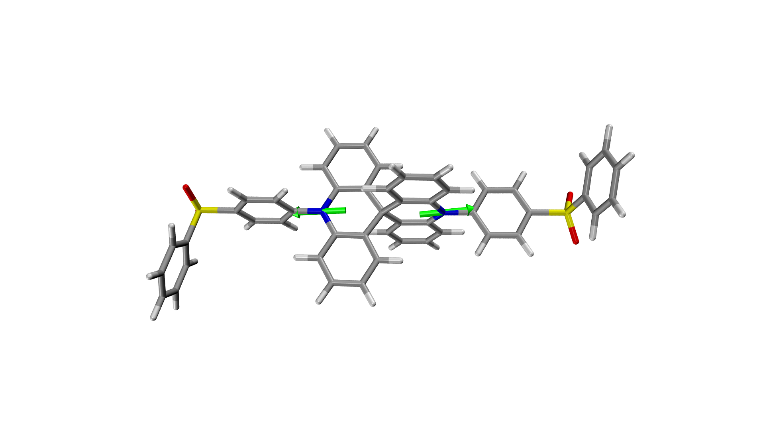  SBA-2DPS | 21.38 | 8.69 | 7.46 | 2.87 | 87 |
| 21.39 | 8.75 | 7.34 | 2.91 |
| 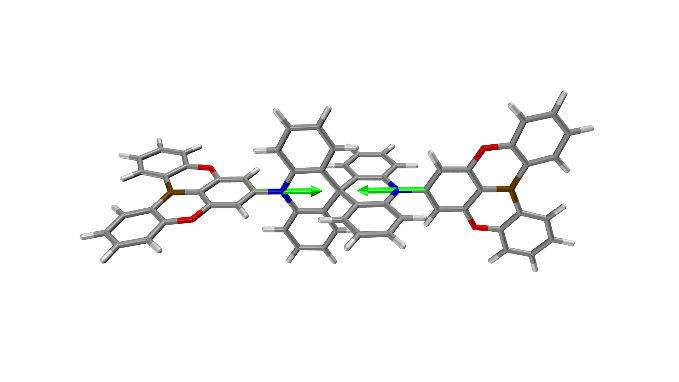  DBA-SAB | 24.53 | 7.65 | 6.89 | 3.56 | 89 |
| 24.53 | 7.65 | 6.89 | 3.56 |
| 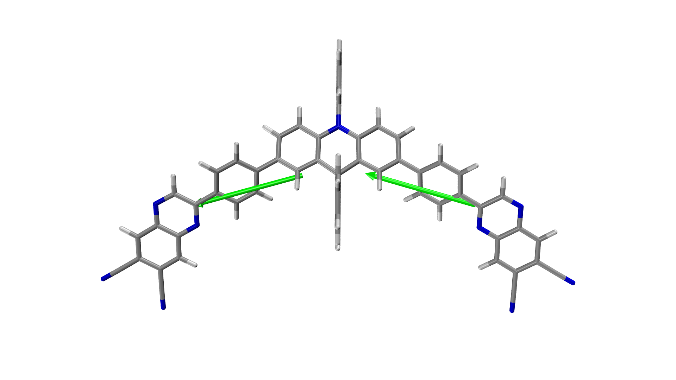  QCN-PhSAC-QCN | 28.14 | 19.10 | 8.56 | 3.29 | 90 |
| 28.14 | 19.10 | 8.56 | 3.29 |

**Table S2.** TDM vectors of heteroleptic phosphors, the corresponding geometric parameters and Θ// values.

| Compound | *Lx*  (Å) | *Ly*  (Å) | *Lz*  (Å) | *m* | Θ//  (%) |
| --- | --- | --- | --- | --- | --- |
| 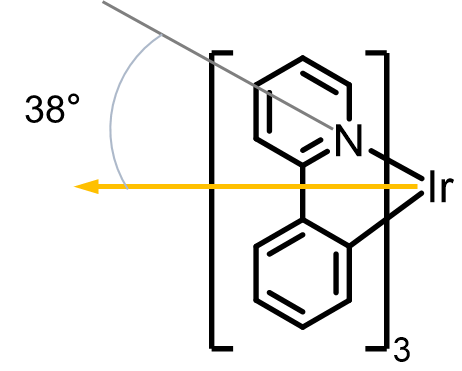  Ir(ppy)3 | 9.31 | 9.04 | 8.53 | 1.09 | 69 |
| 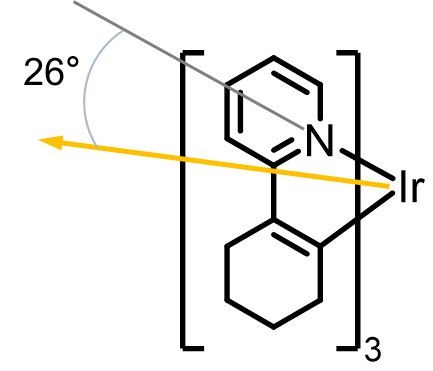  Ir(chpy)3 | 10.60 | 8.73 | 8.71 | 1.22 | 77 |
| 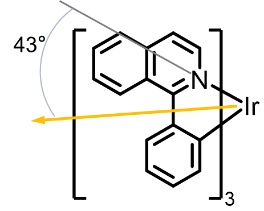  Ir(piq)3 | 14.04 | 9.83 | 9.80 | 1.43 | 78 |

**Fig. S5.** CV oxidation and reduction curves of SAF-27MXNP, SAF-36MXNP, SAF-36MXBP and SAF-36CNNP.

**
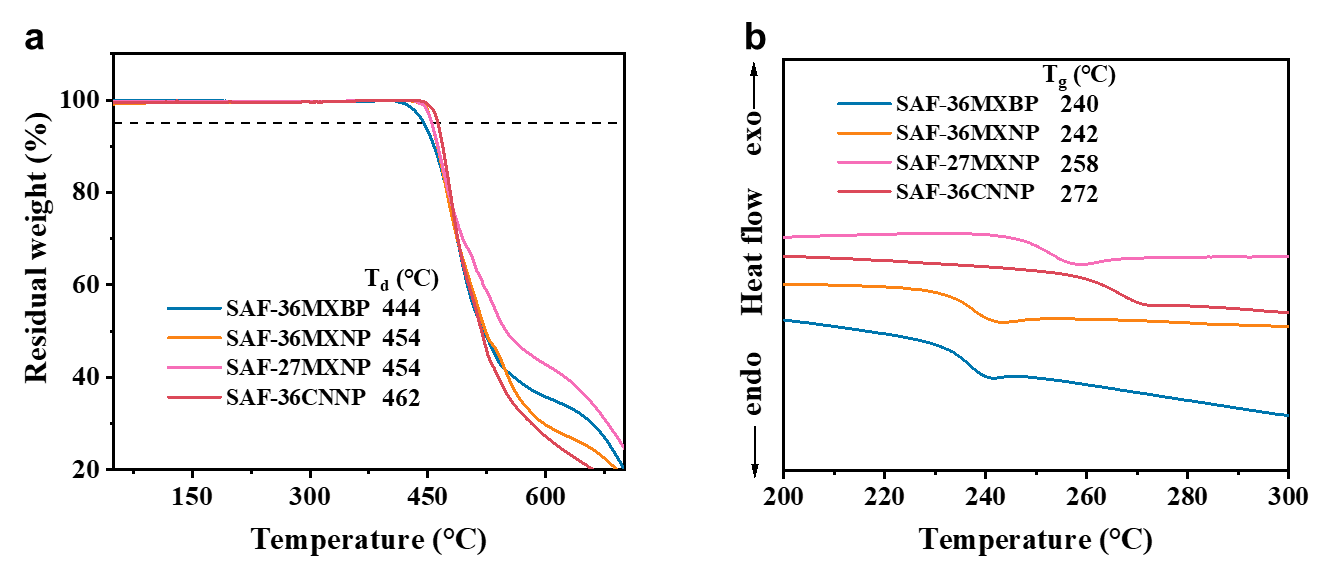
**

**Fig. S6.** Thermal properties. (a) TGA and (b) DSC curves of SAF-27MXNP, SAF-36MXNP, SAF-36MXBP and SAF-36CNNP.

**
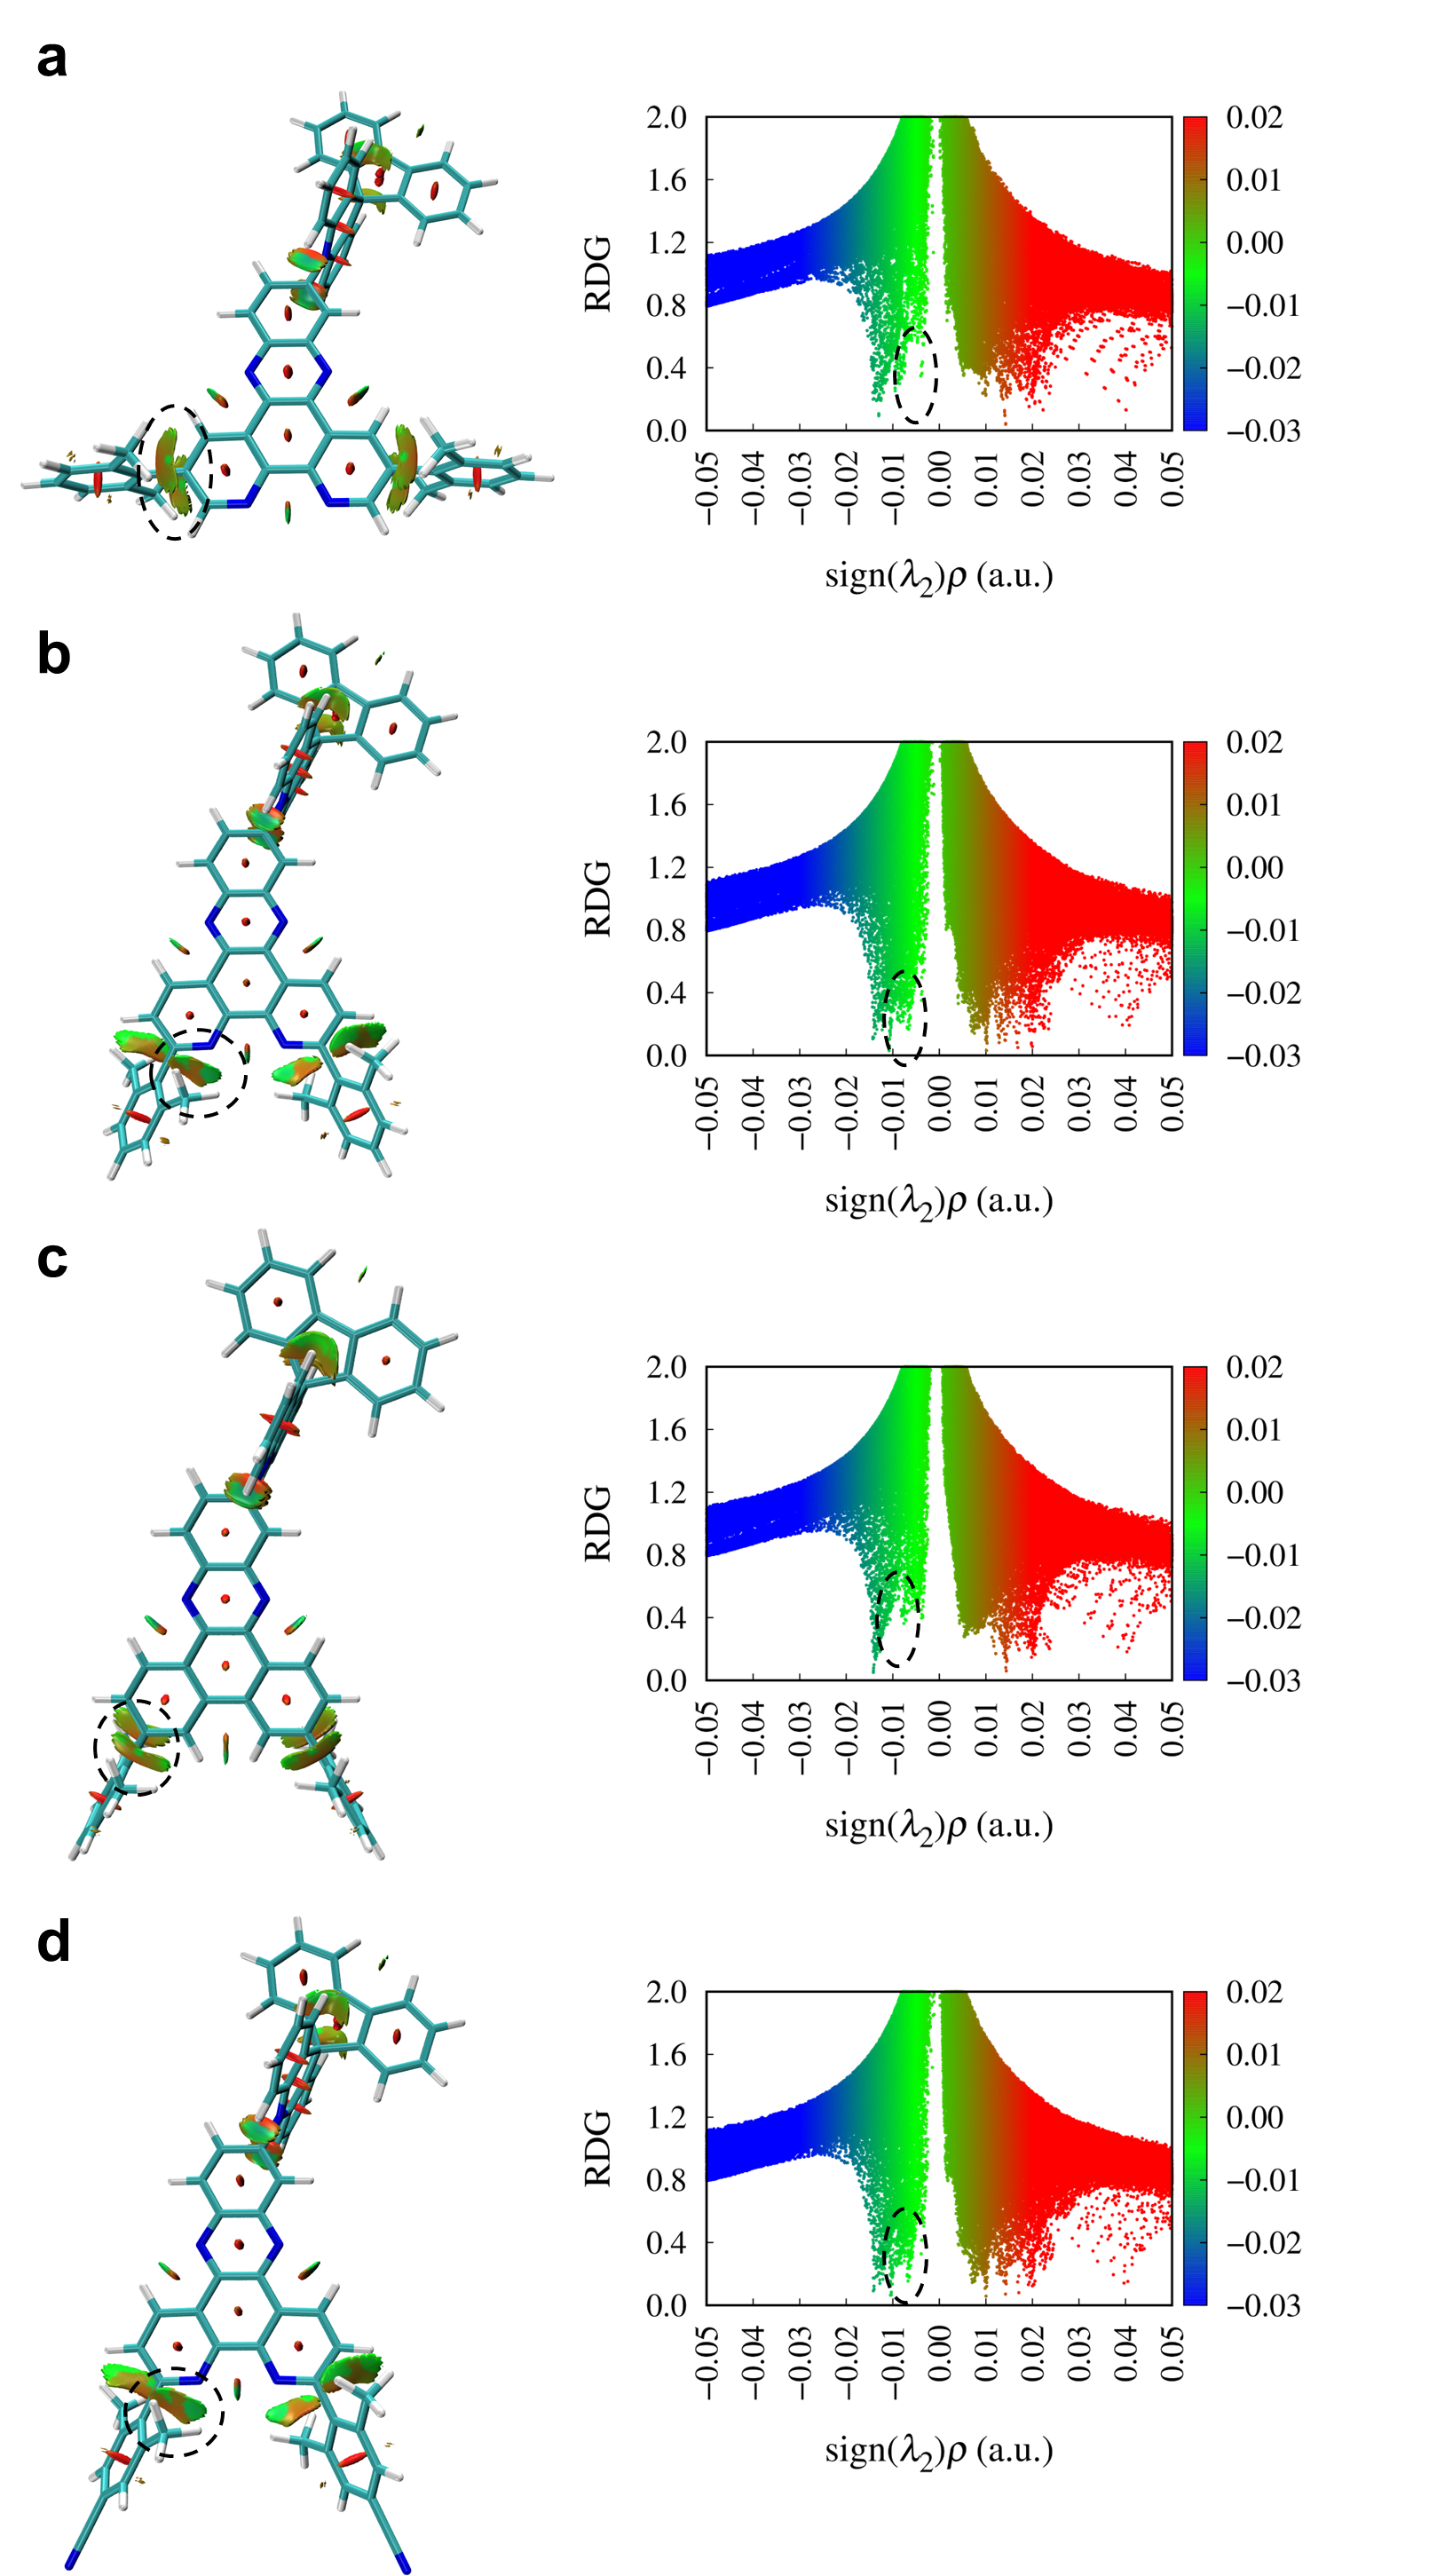
**

**Fig. S7.** Reduced density gradient analysis of (a) SAF-27MXNP, (b) SAF-36MXNP, (c) SAF-36MXBP and (d) SAF-36CNNP.

**
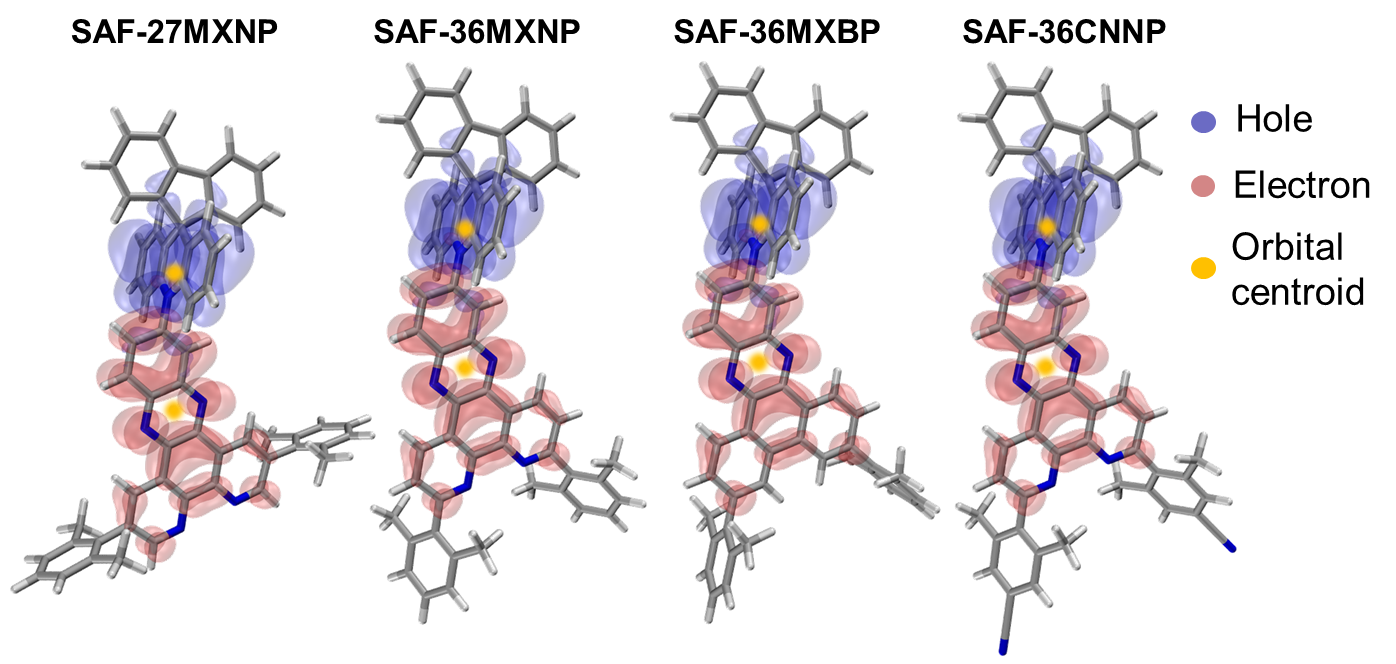
**

**Fig. S8.** NTO distribution of the four emitters.

**
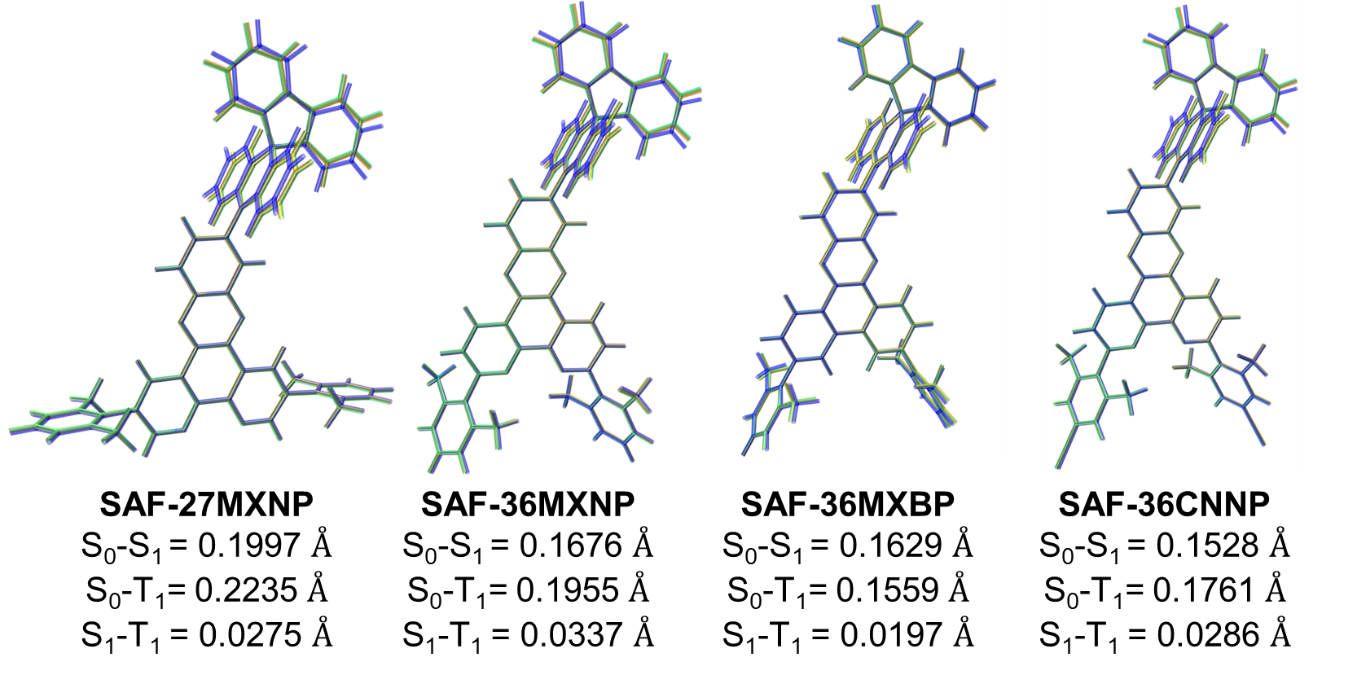
**

**Fig. S9.** S0, S1 and T1 (in blue, orange and green, respectively) geometric variations of the five emitters and the corresponding root-mean-square displacements.


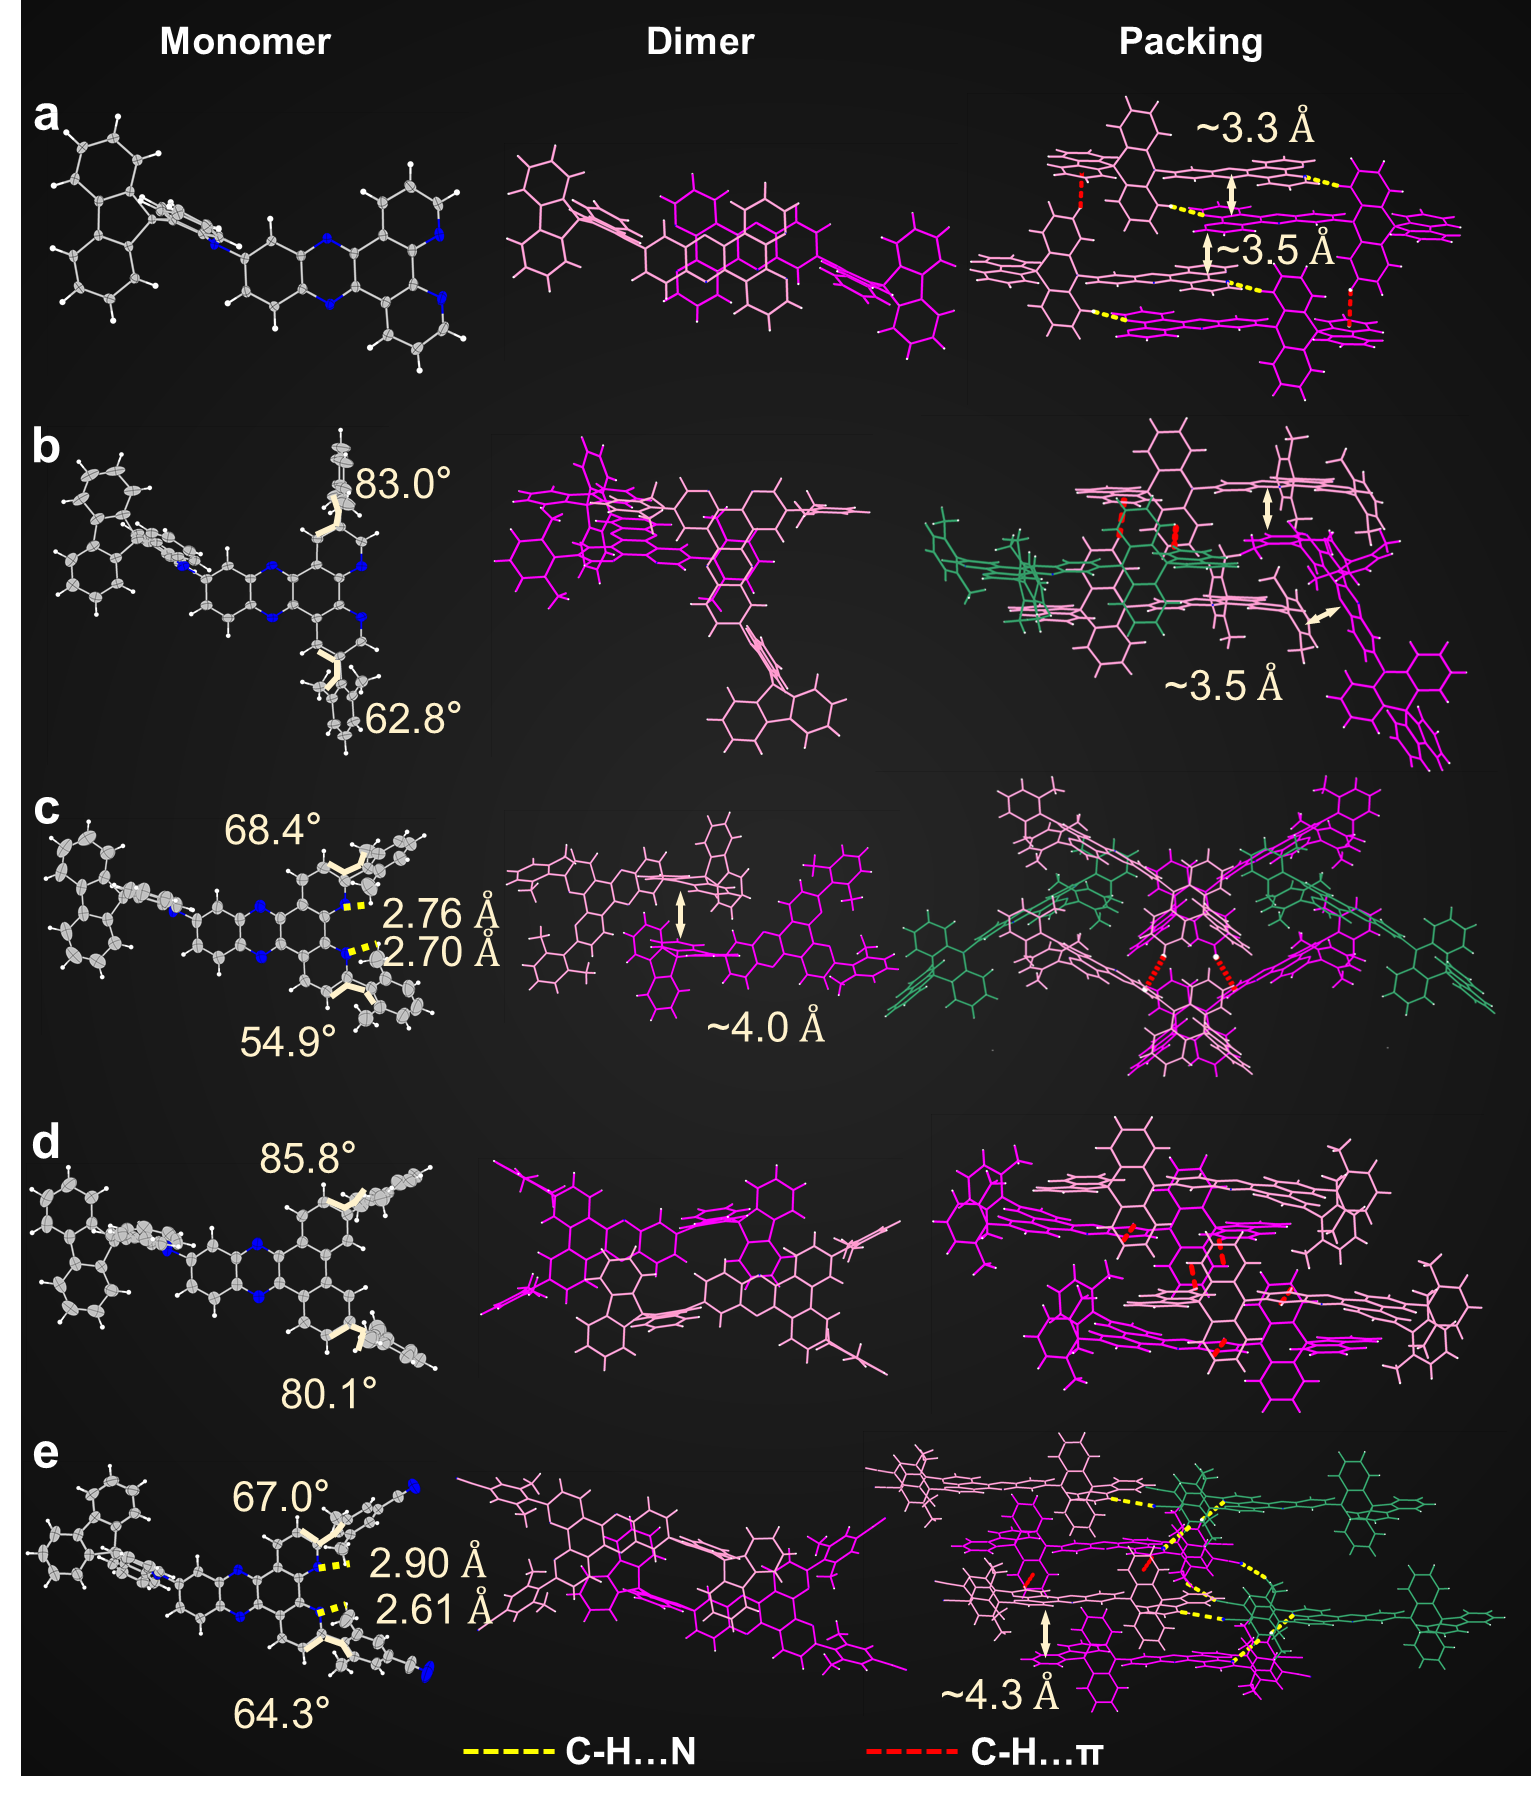


**Fig. S10.** Crystal structures. Monomer, dimer structures and packing modes of (a) SAF-2NP (b) SAF-27MXNP, (c) SAF-36MXNP, (d) SAF-36MXBP and (e) SAF-36CNNP.

**
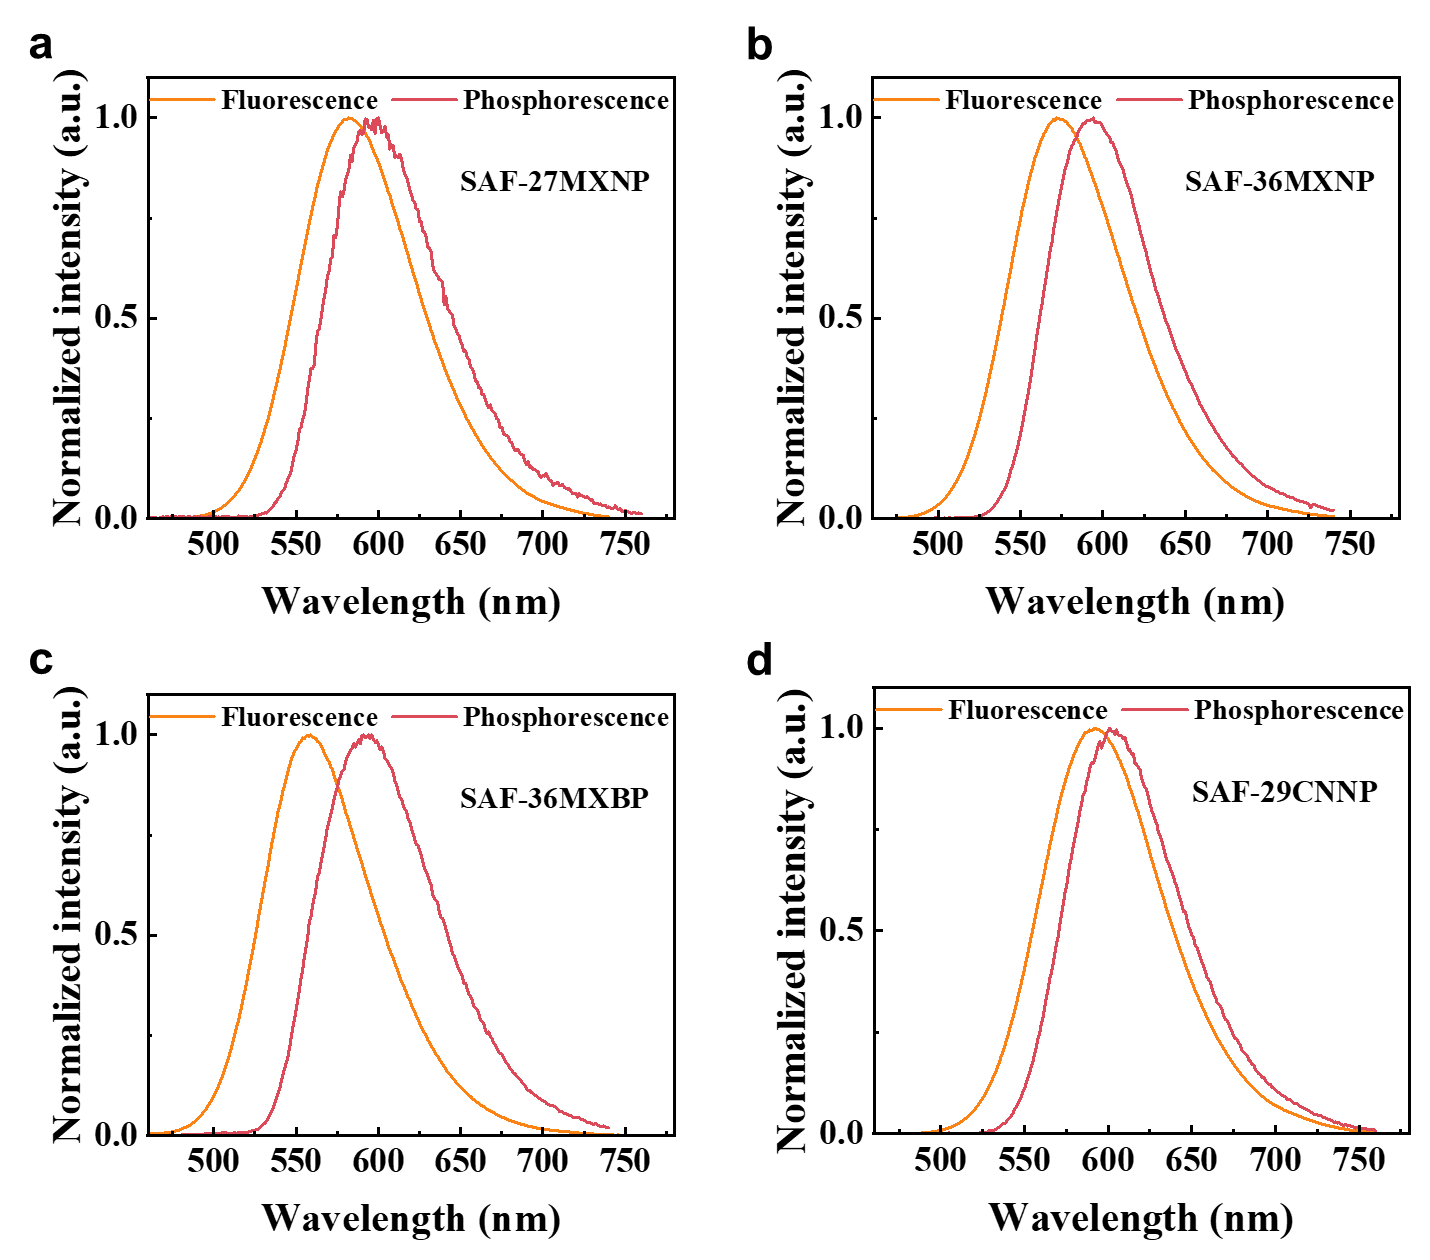
**

**Fig. S11.** PL spectra. Fluorescence and phosphorescence spectra of (a) SAF-27MXNP, (b) SAF-36MXNP, (c) SAF-36MXBP and (d) SAF-36CNNP measured at 77K.

**Table S3.** Summary of physical properties of SAF-27MXNP, SAF-36MXNP, SAF-36MXBP and SAF-36CNNP.

| Compound | λPL*,†  (nm) | ΦPL*  (%) | Θ//*  (%) | HOMO/  LUMO‡  (eV) | S1/T1/  Δ*E*ST*,§  (eV) | τp*  (ns) | τd*  (μs) | *k*f  (107 s−1) | *k*nr  (105 s−1) | *k*RISC  (105 s−1) |
| --- | --- | --- | --- | --- | --- | --- | --- | --- | --- | --- |
| **SAF-27MXNP** | 582 | 91.0 | 87.9 | −5.38/−3.05 | 2.39/2.29/  0.10 | 15.0 | 9.7 | 1.78 | 17.56 | 3.52 |
| **SAF-36MXNP** | 572 | 95.0 | 92.4 | −5.37/−3.04 | 2.42/2.29/  0.13 | 12.9 | 9.1 | 2.49 | 5.59 | 3.35 |
| **SAF-36MXBP** | 559 | 99.3 | 92.3 | −5.34/−2.92 | 2.50/2.31/  0.19 | 9.8 | 13.1 | 4.76 | 3.35 | 1.63 |
| **SAF-36CNNP** | 592 | 93.6 | 94.0 | −5.37/−3.12 | 2.35/2.27/  0.08 | 17.1 | 6.5 | 1.84 | 12.57 | 4.58 |

*Measured using the film of CBP:10 wt% emitter. †Emission peaks of fluorescence spectra. ‡Estimated according to the CV results. §Obtained from the onsets of the fluorescence and phosphorescence spectra at 77 K.


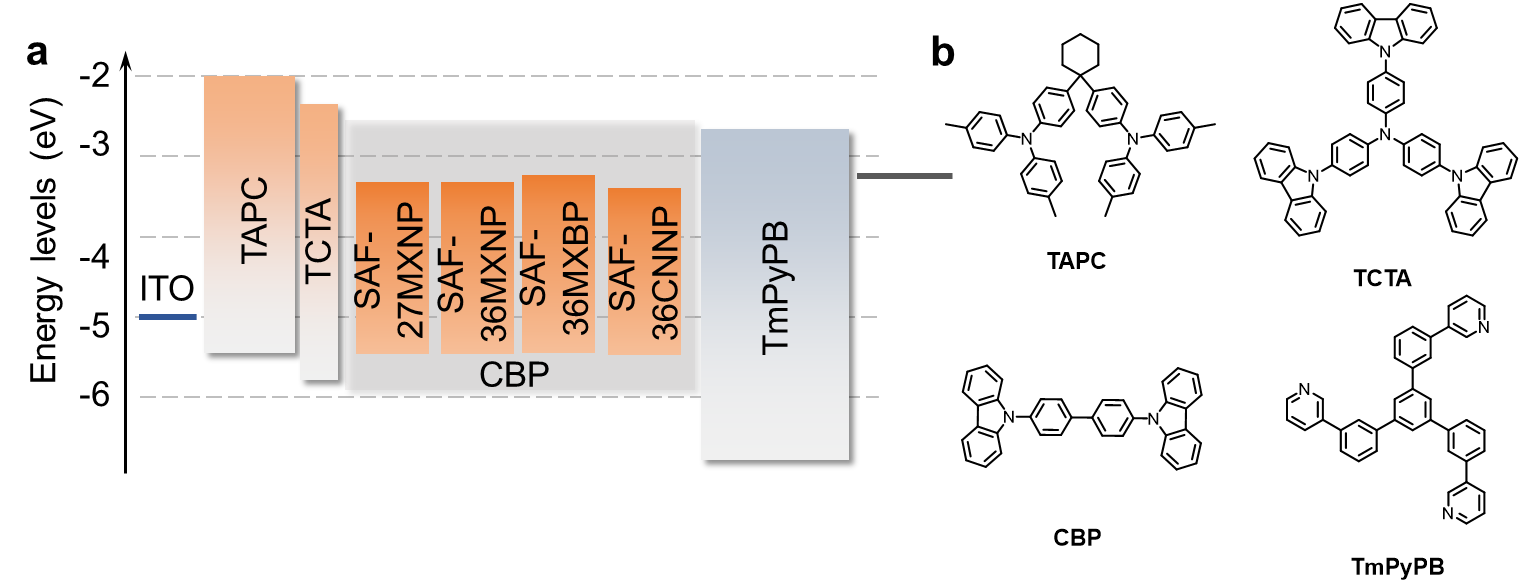


**Fig. S12.** OLED devices. (a) Device structures and corresponding energy levels. (b) Chemical structures of materials used in OLEDs.


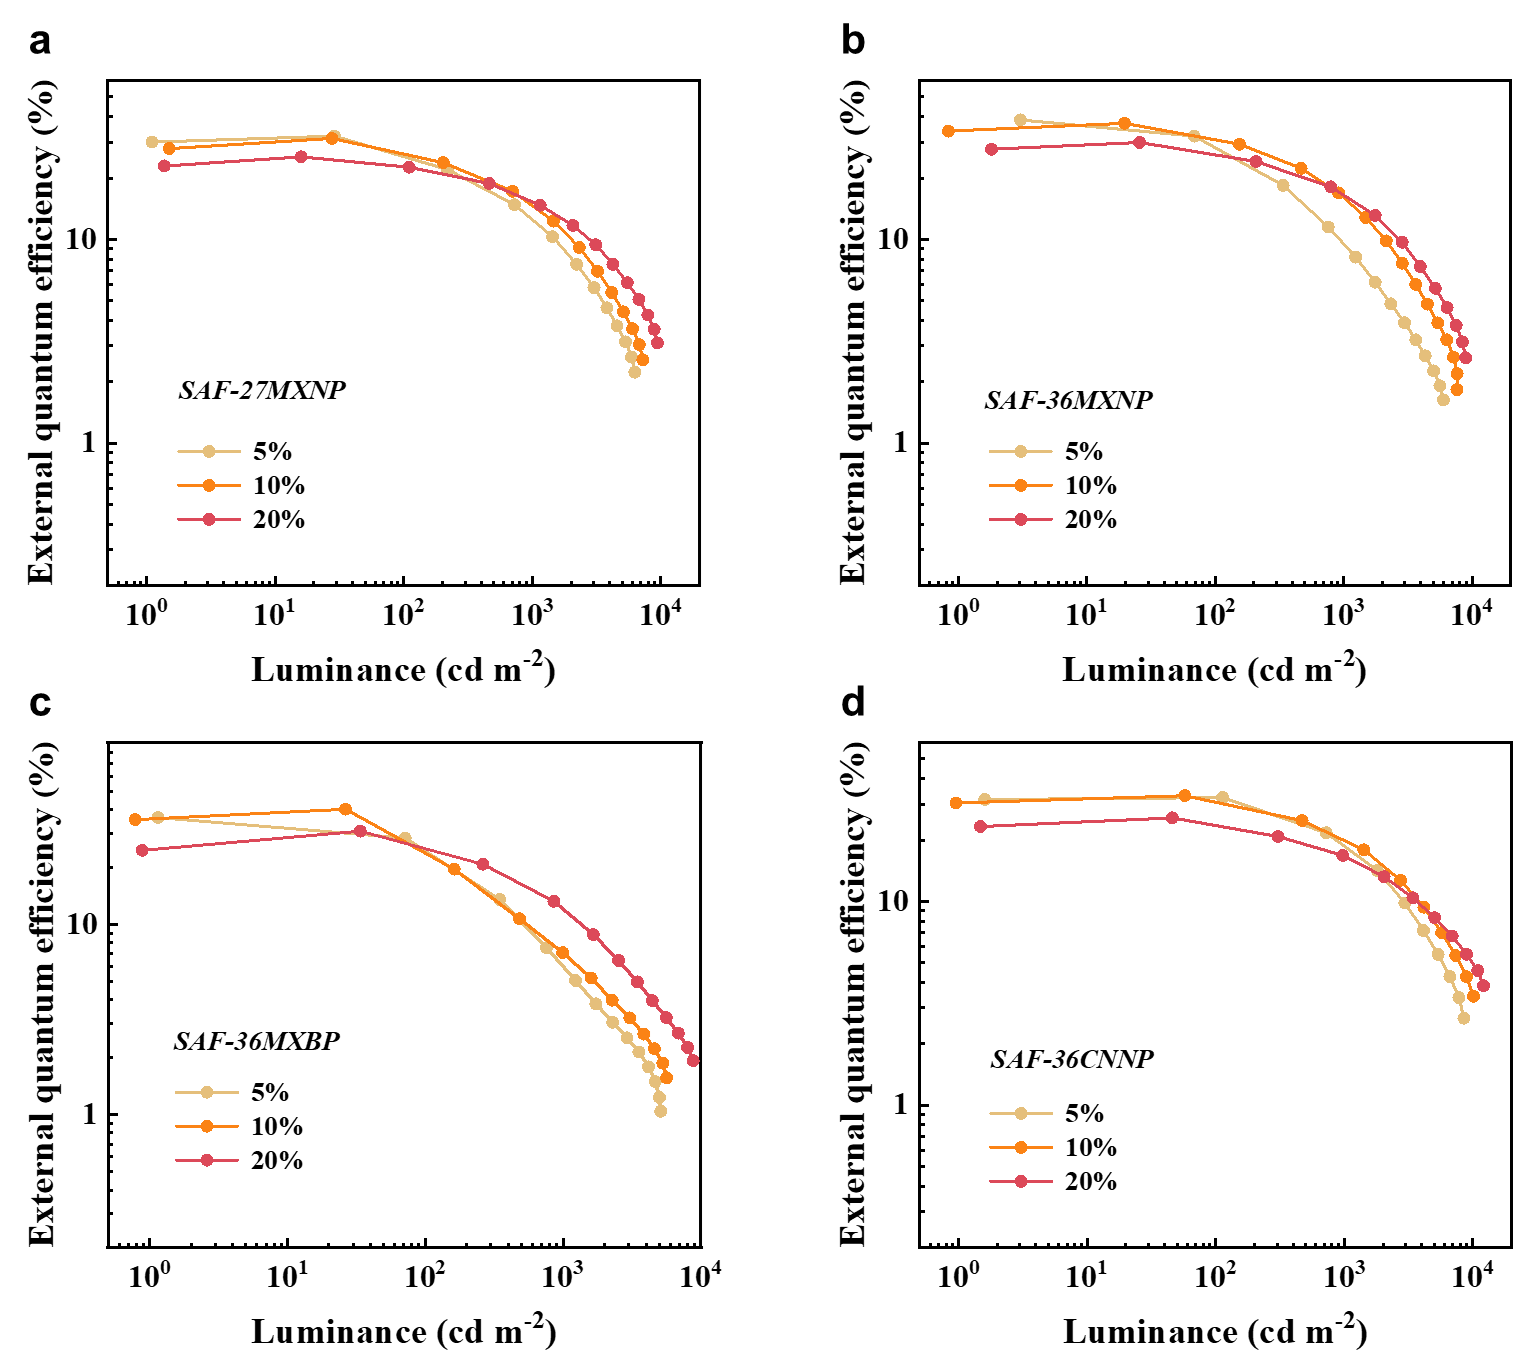


**Fig. S13.** Device EQEs under different doping concentrations. (a) SAF-27MXNP. (b) SAF-36MXNP. (c) SAF-36MXBP. (d) SAF-36CNNP.

**Table S4.** The performance of devices based on SAF-27MXNP, SAF-36MXNP, SAF-36MXBP and SAF-36CNNP.

| Emitter | Weight  ratio (%) | Von*  (V) | λEL†  (nm) | Maximum  CE/PE/EQE  (cd A-1/lm W-1/%) | EQE at 100  and 1000  cd m-2 (%) | CIE‡  (x,y) |
| --- | --- | --- | --- | --- | --- | --- |
| **SAF-27MXNP** | 5 | 3.5 | 580 | 88.6/72.2/32.1 | 25.2/12.4 | (0.52,0.48) |
| 10 | 3.3 | 588 | 75.1/62.1/30.9 | 26.4/14.8 | (0.54,0.46) |
| 20 | 3.2 | 596 | 54.8/48.2/25.4 | 22.6/15.2 | (0.57,0.43) |
| **SAF-36MXNP** | 5 | 3.3 | 572 | 117/105/38.6 | 28.2/9.4 | (0.49,0.51) |
| 10 | 3.3 | 580 | 104/88.1/37.1 | 30.8/16.0 | (0.51,0.49) |
| 20 | 3.1 | 584 | 76.0/66.1/29.9 | 25.8/16.5 | (0.53,0.46) |
| **SAF-36MXBP** | 5 | 3.1 | 564 | 118/117/36.4 | 24.3/6.0 | (0.46,0.53) |
| 10 | 3.1 | 568 | 129/113/40.3 | 23.6/7.0 | (0.48,0.52) |
| 20 | 2.9 | 572 | 93.2/86.1/30.9 | 25.0/12.0 | (0.50,0.50) |
| **SAF-36CNNP** | 5 | 3.1 | 588 | 81.1/74.7/32.3 | 32.2/18.7 | (0.54,0.46) |
| 10 | 3.0 | 596 | 68.6/62.6/33.0 | 30.8/20.1 | (0.57,0.43) |
| 20 | 2.9 | 608 | 42.9/41.8/25.7 | 23.5/16.7 | (0.60,0.40) |

*Voltage at 1 cd m−2. †EL spectra peaks. ‡At 1000 cd m-2.

**Table S5.** Device performance of representative yellow-to-red TADF OLEDs with host-guest emitting layer.

| Emitter | λmax  (nm) | EQEmax  (%) | CIE  (x,y) | Ref. |
| --- | --- | --- | --- | --- |
| **SAF-27MXNP** | **580** | **32.1** | **(0.52,0.48)** | **This work** |
| **SAF-36MXNP** | **572** | **38.6** | **(0.49,0.51)** |
| **SAF-36MXBP** | **568** | **40.3** | **(0.48,0.52)** |
| **SAF-36CNNP** | **596** | **33.0** | **(0.57,0.43)** |
| SAF-2NP | 576 | 32.5 | (0.49,0.50) | 2 |
| NAI-DPAC | 584 | 29.2 | (0.52,0.47) | 3 |
| PzTDBA | 576 | 30.3 | (0.49,0.50) | 4 |
| DCPPr-α-NDPA | 606 | 31.5 | (0.58,0.42) | 5 |
| TPA–PZCN | 628 | 27.4 | (0.65,0.35) | 6 |
| BPPZ-PXZ | 604 | 25.2 | (0.57,0.43) | 7 |
| SpAcDBA | 567 | 30 | (0.46,0.52) | 8 |
| QCN-PhSAC-QCN | 620 | 39.1 | (0.60,0.40) | 9 |
| TCZ-F-DABNA | 588 | 39.2 | (0.54,0.44) | 10 |
| BPSPXZ | 604 | 33.4 | (0.59, 0.41) | 11 |
| S-BN | 600 | 39.9 | (0.61,0.39) | 12 |
| BNIP-tBuDPAC | 554 | 39.4 | (0.41,0.56) | 13 |
| BBCz-R | 616 | 22 | (0.67,0.33) | 14 |
| DBSN | 556 | 21.8 | (0.42,0.57) | 15 |
| QAD-mTDPA | 589 | 26.3 | (0.55,0.44) | 16 |


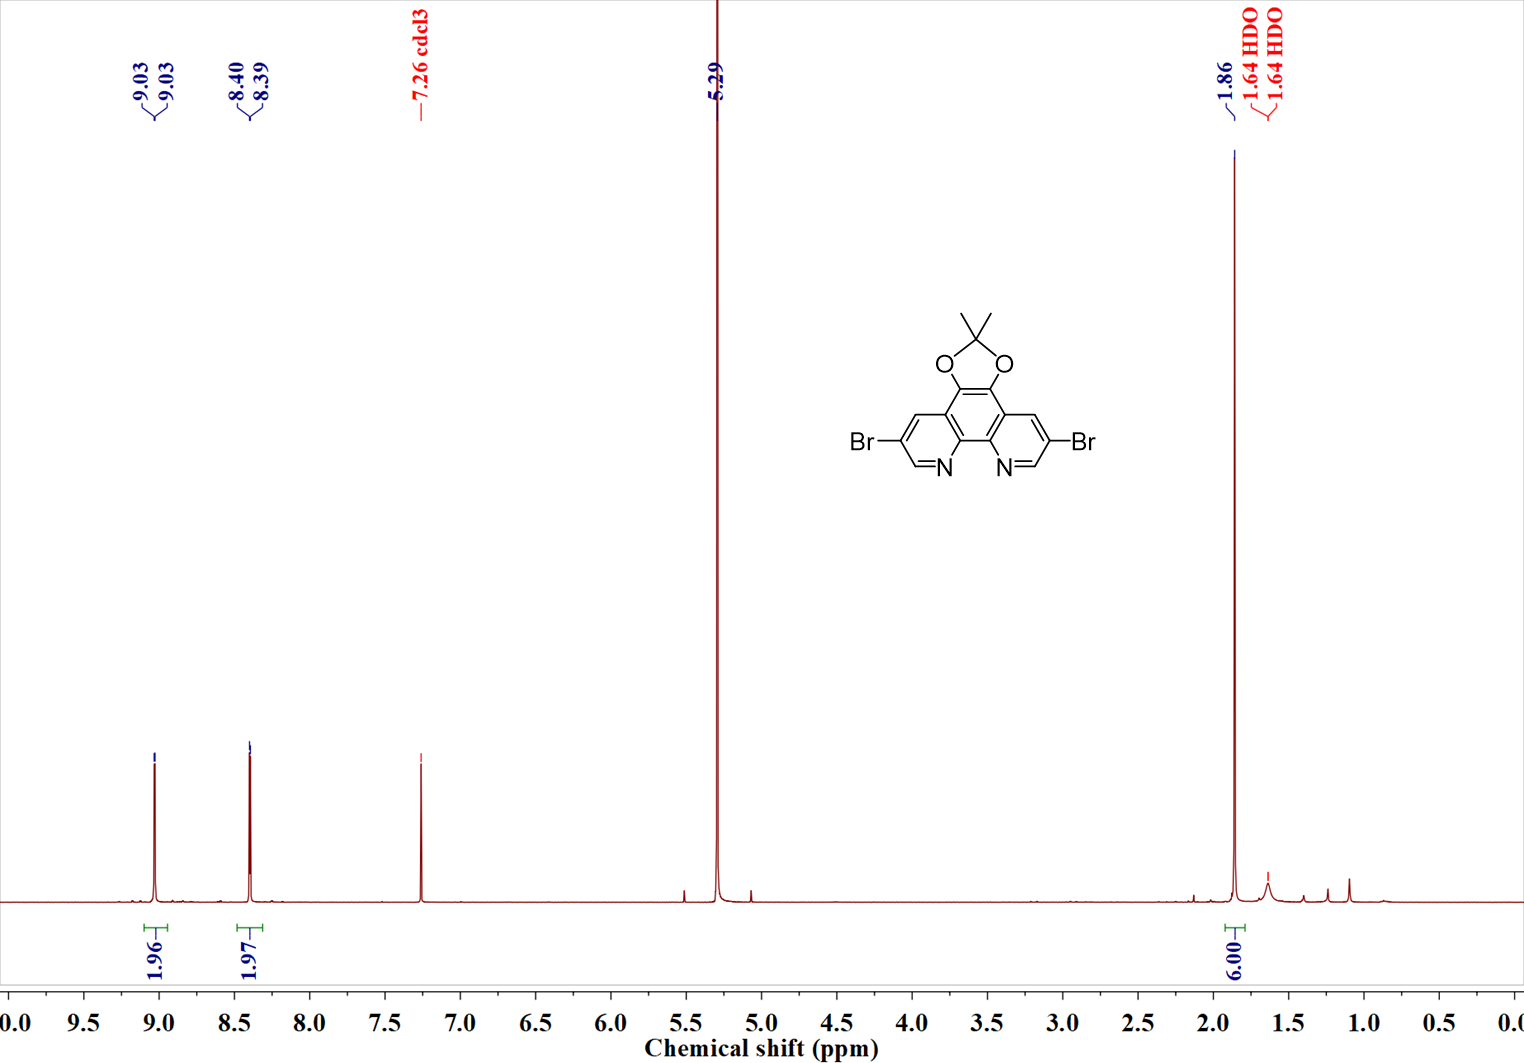


**Fig. S14.** 1H NMR spectra of intermediate 1 in CDCl3 (the peak at 5.29 ppm corresponds the residual dichloromethane).


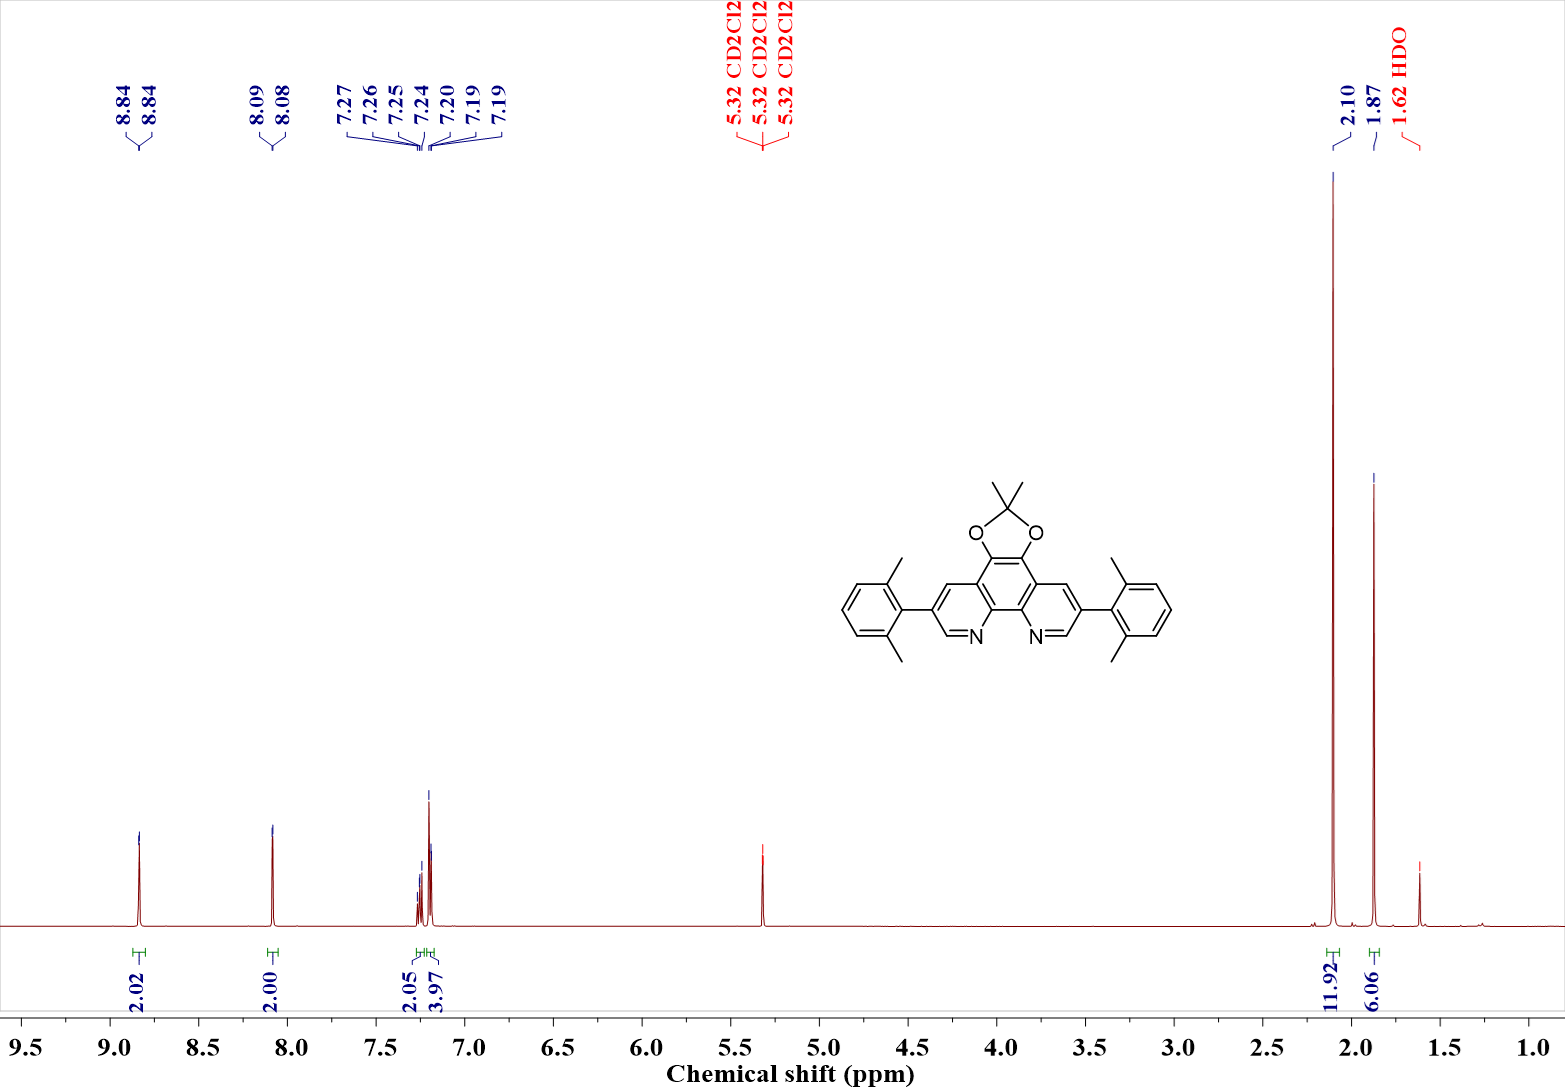


**Fig. S15.** 1H NMR spectra of intermediate 2 in CD2Cl2.


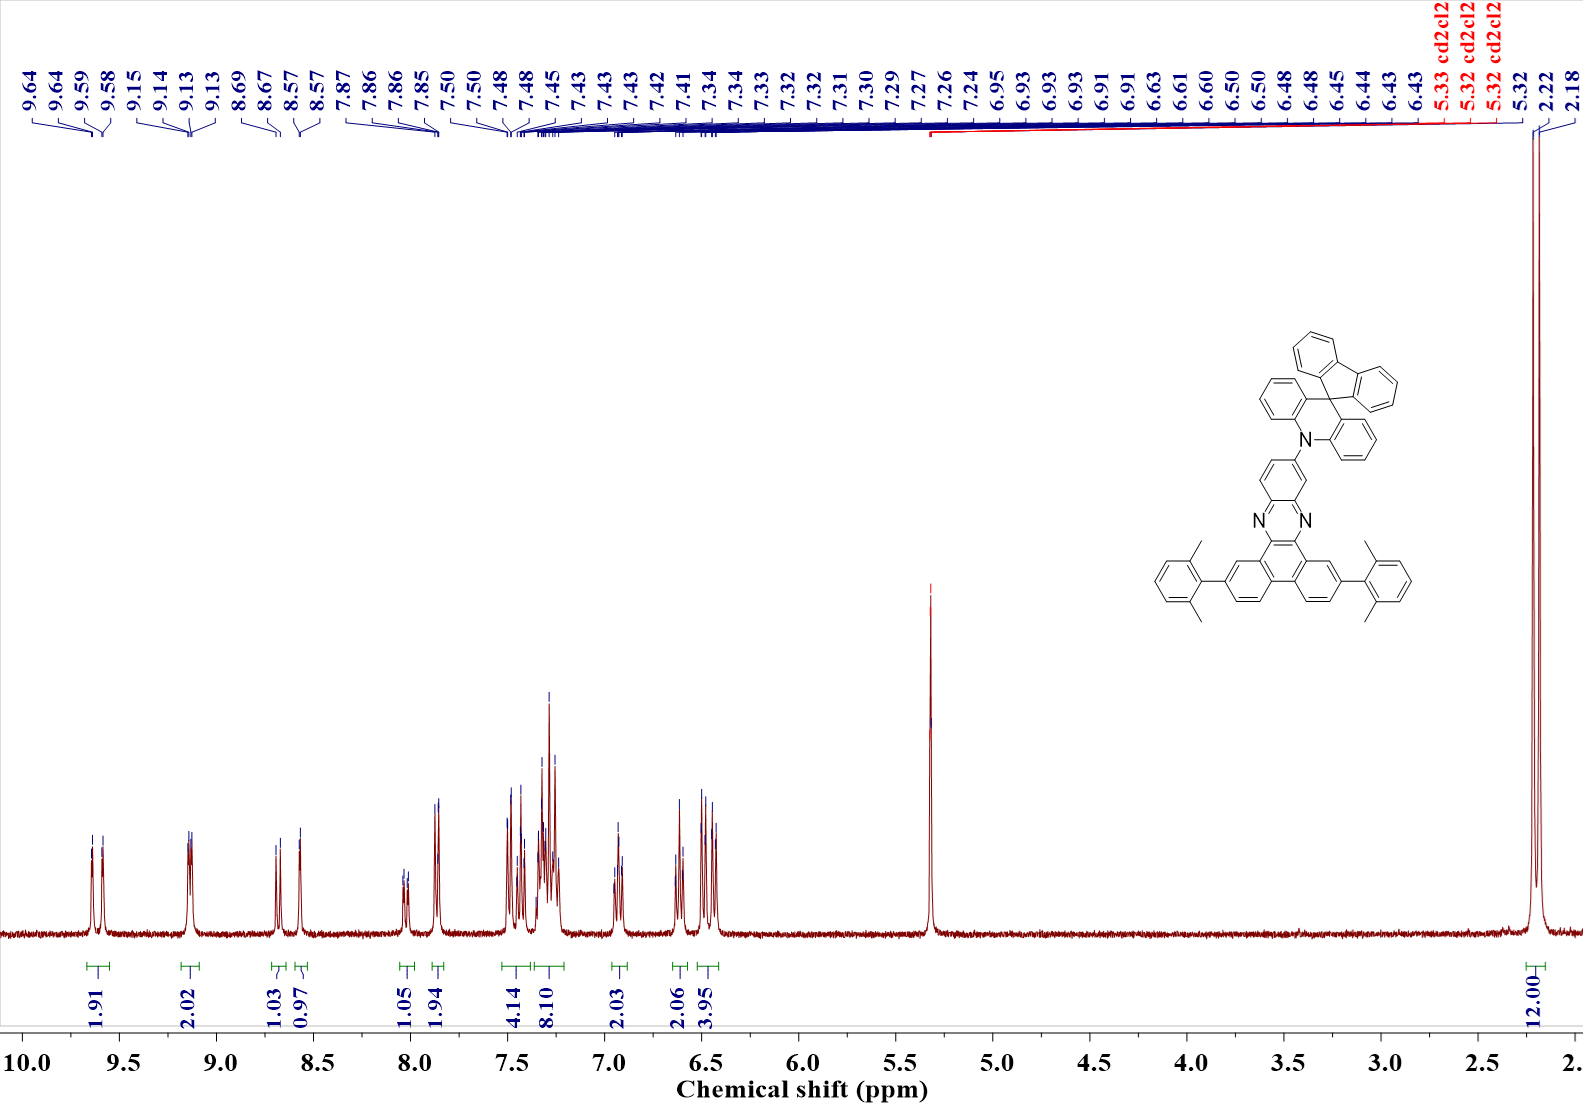


**Fig. S16.** 1H NMR spectra of SAF-27MXNP in CD2Cl2.


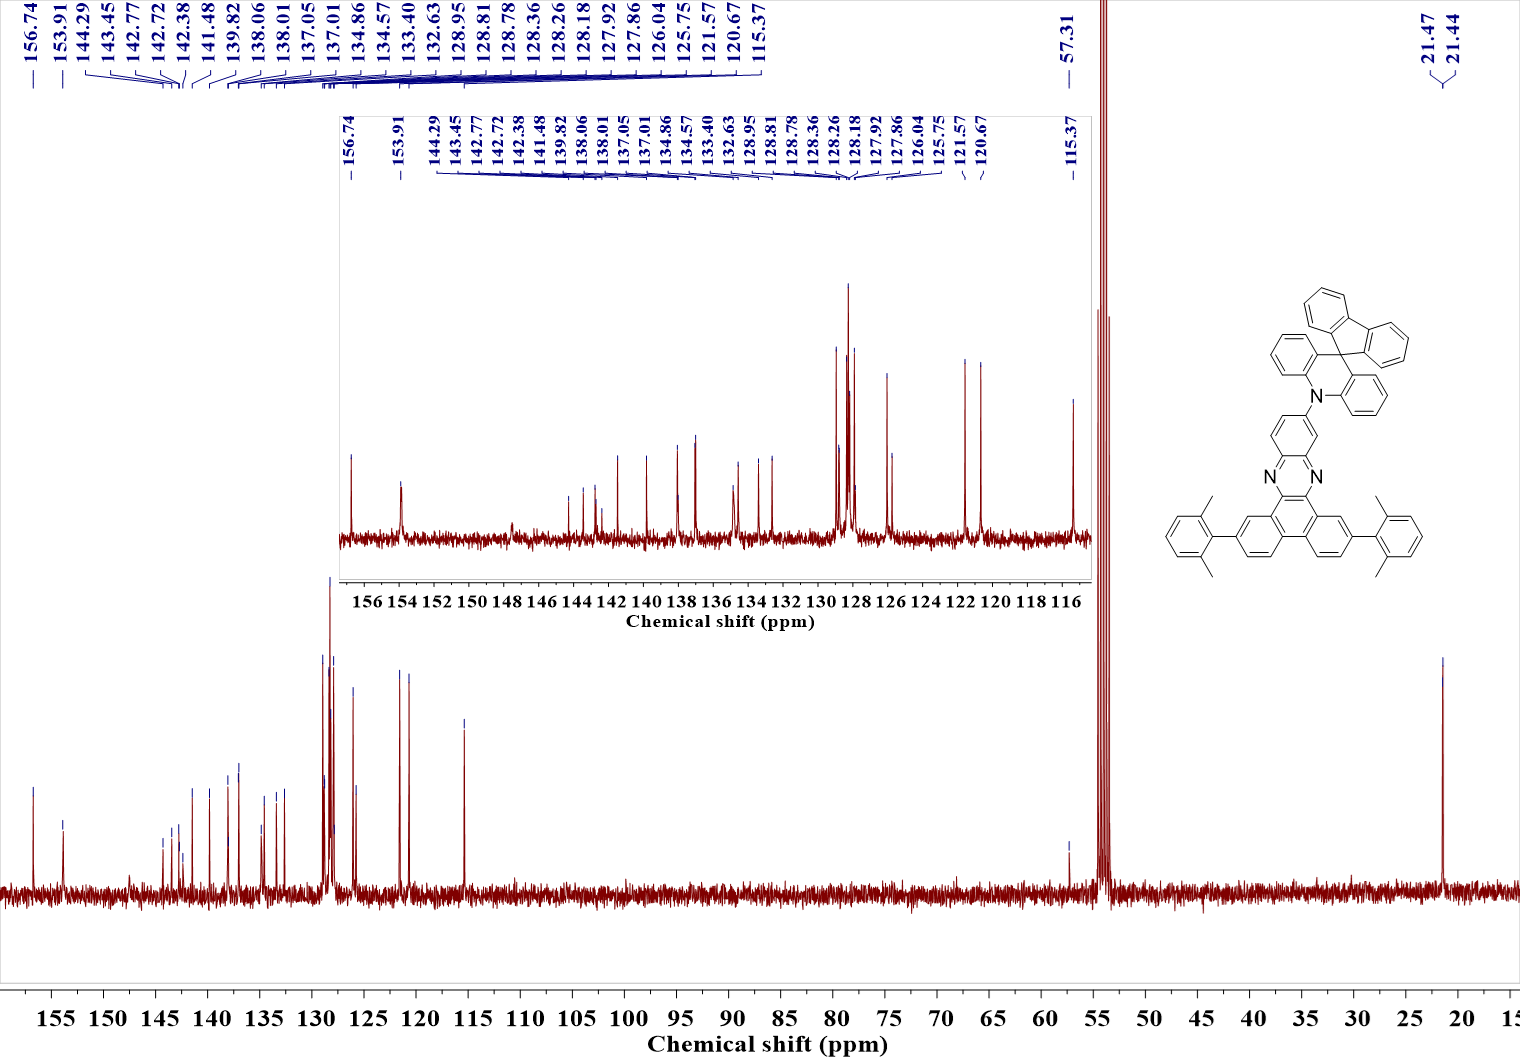


**Fig. S17.** 13C NMR spectra of SAF-27MXNP in CD2Cl2.


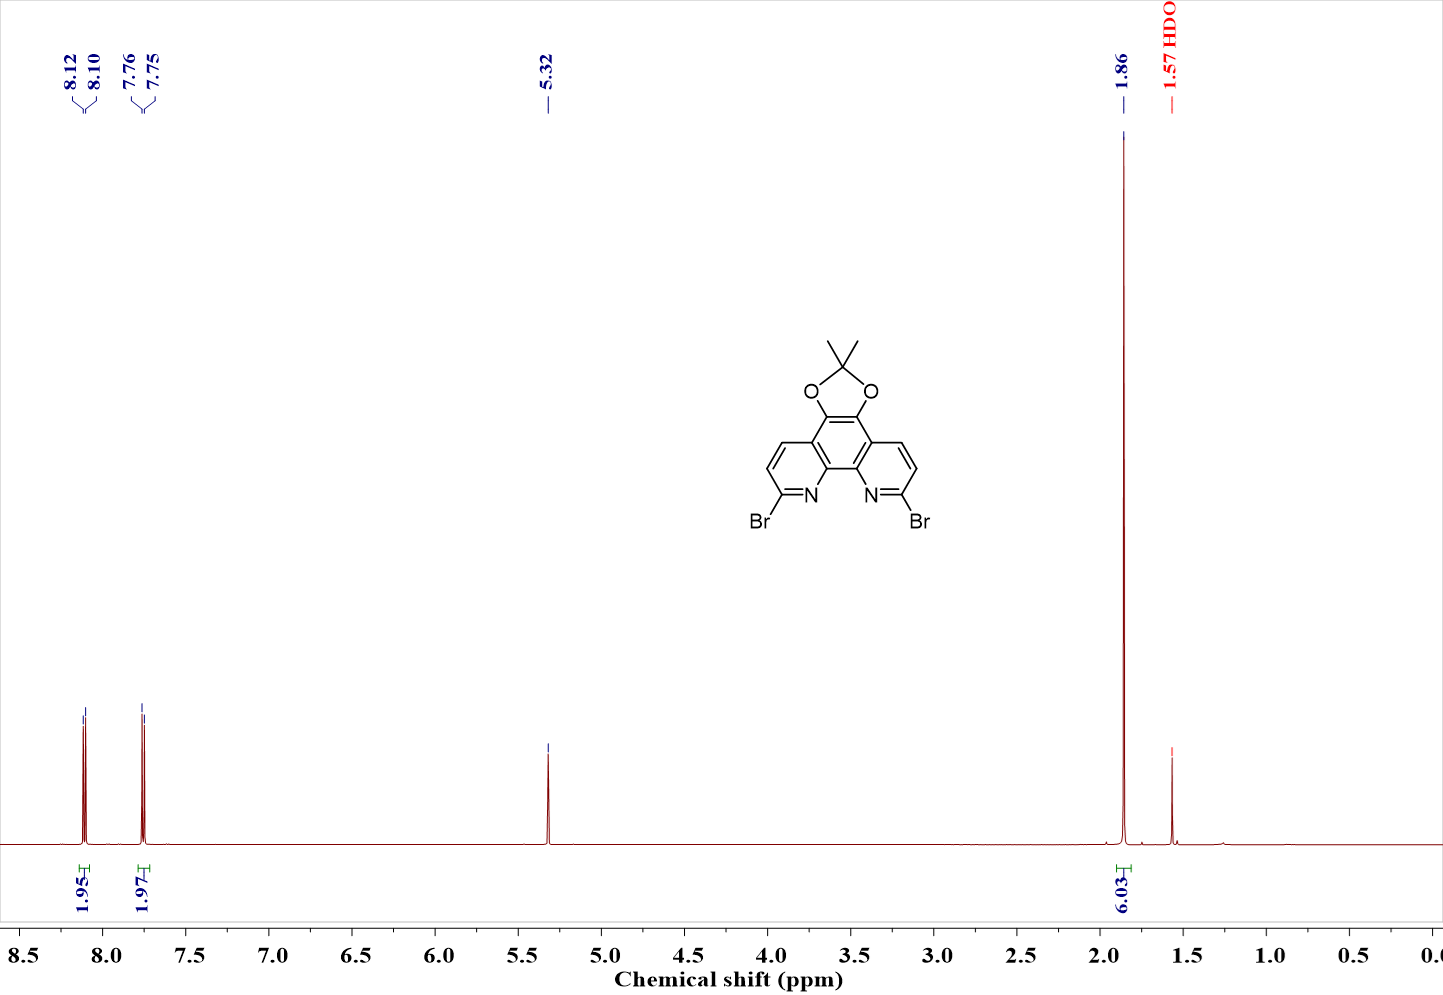


**Fig. S18.** 1H NMR spectra of intermediate 4 in CD2Cl2.


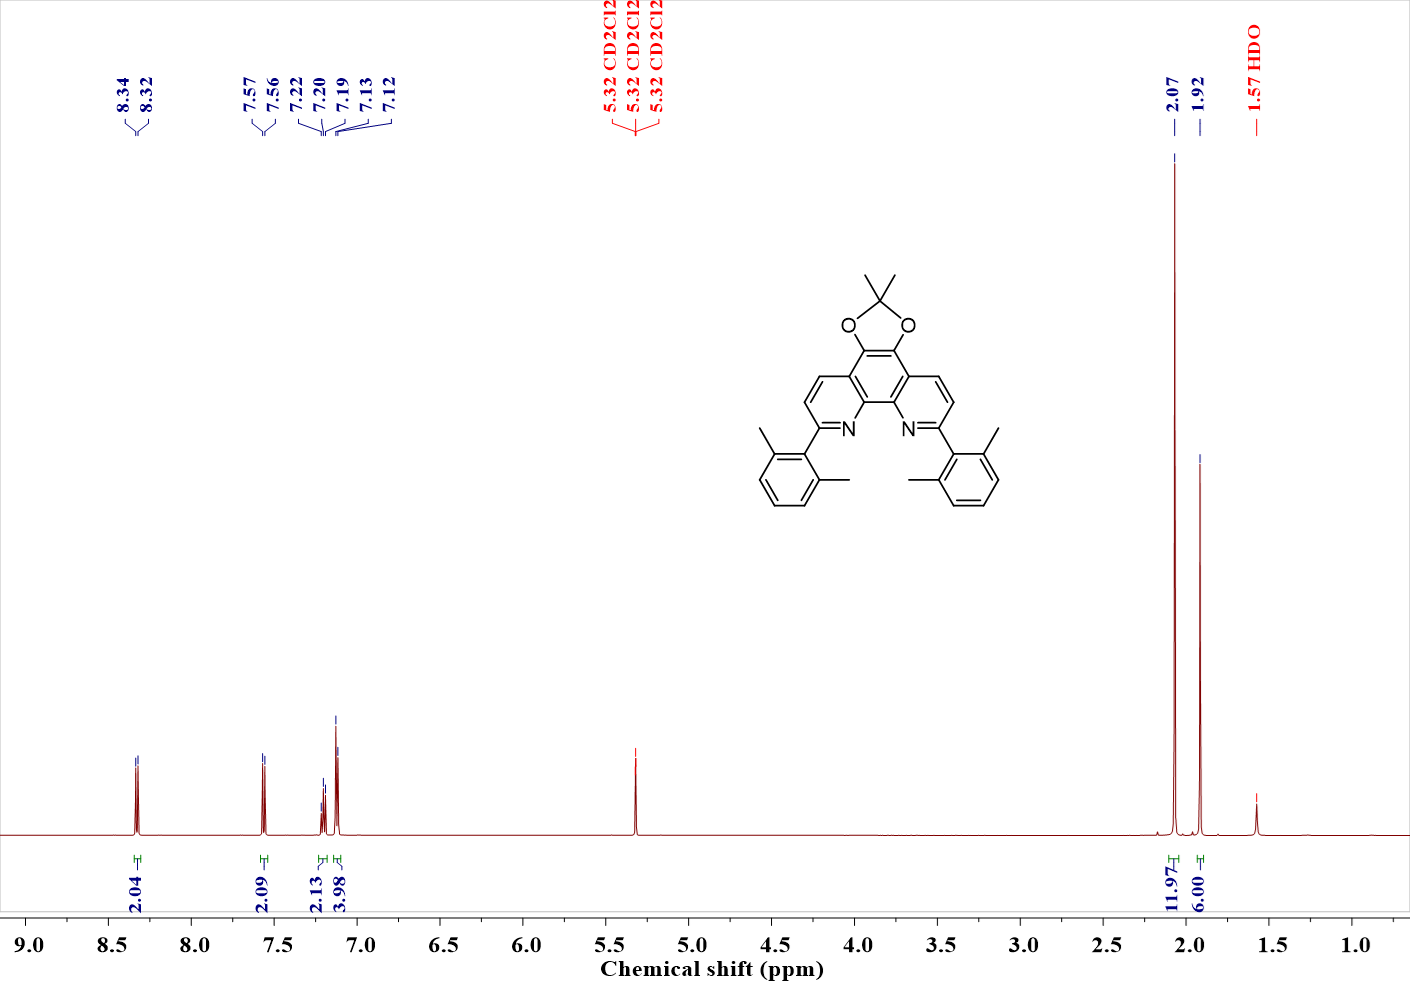


**Fig. S19.** 1H NMR spectra of intermediate 5 in CD2Cl2.


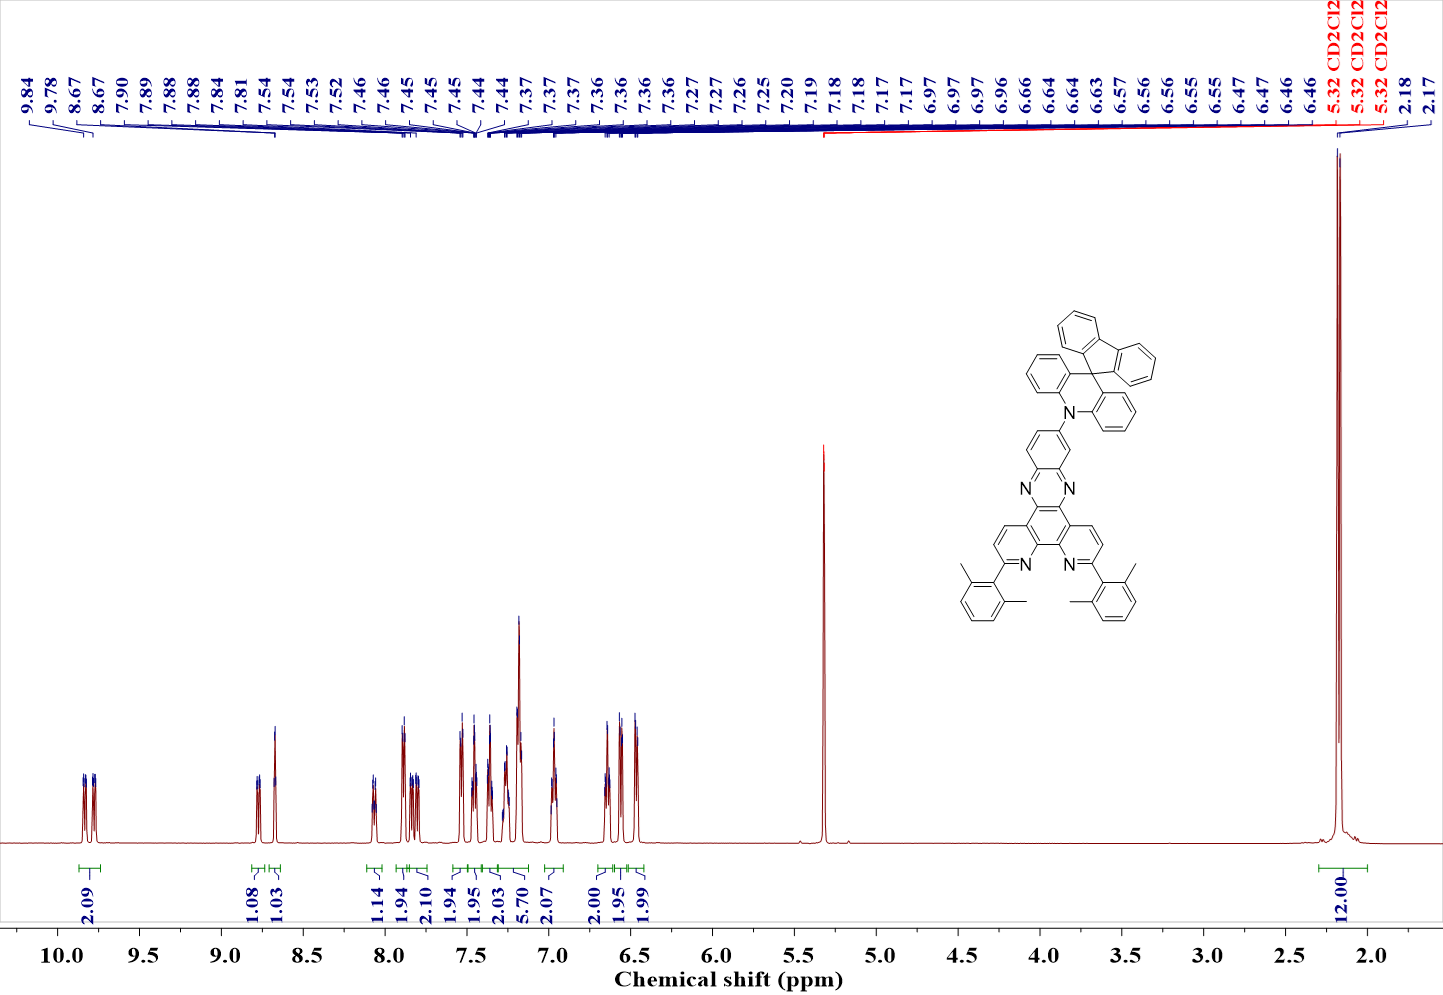


**Fig. S20.** 1H NMR spectra of SAF-36MXNP in CD2Cl2.


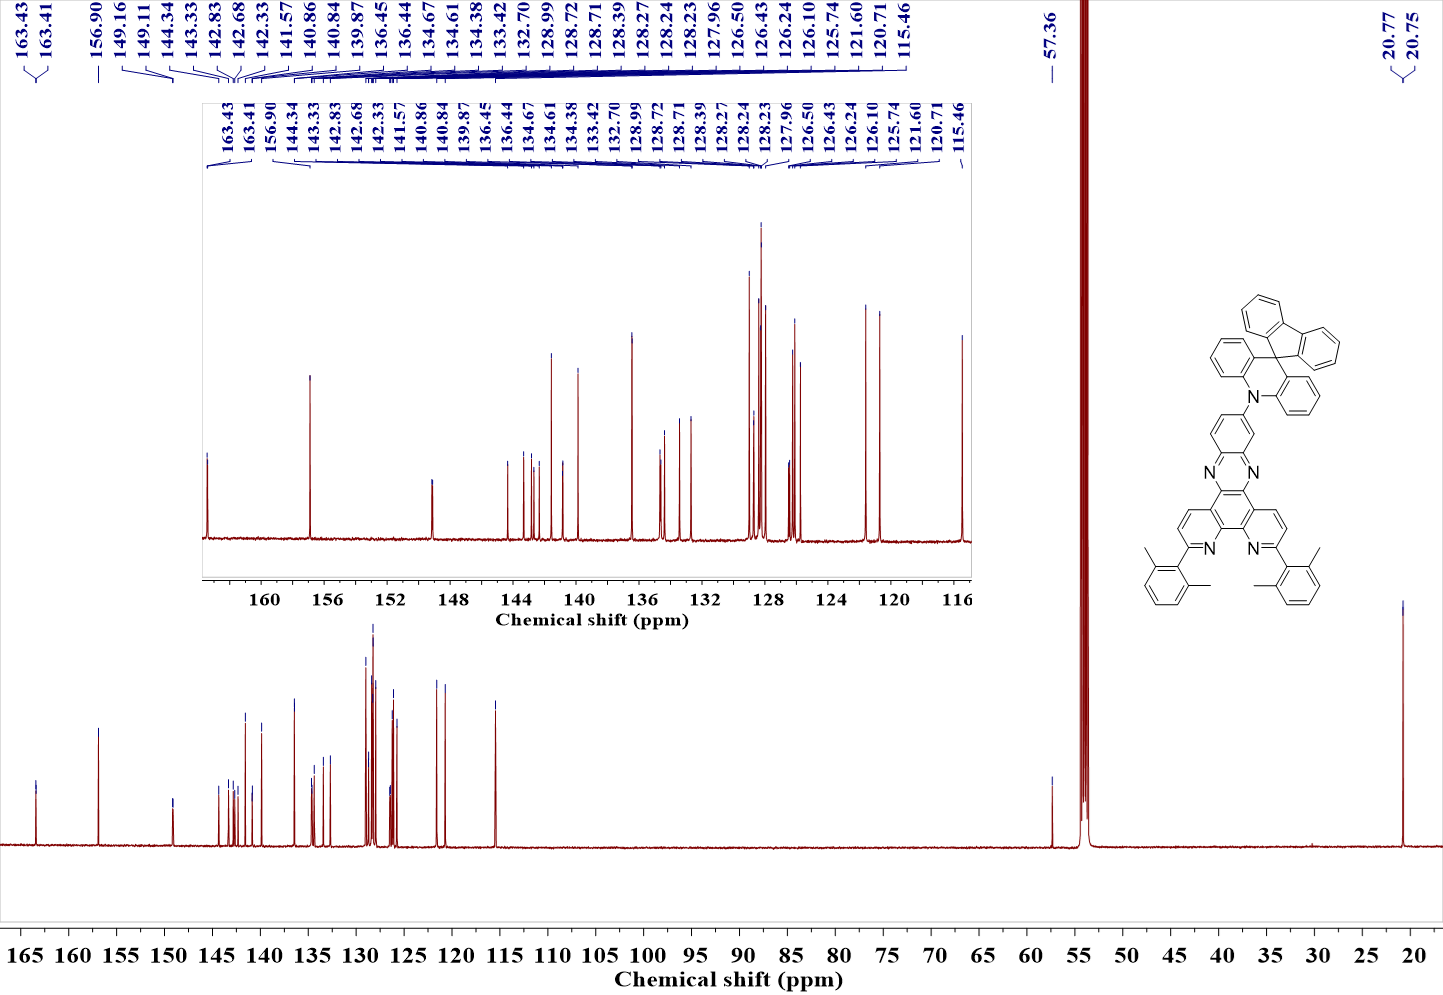


**Fig. S21.** 13C NMR spectra of SAF-36MXNP in CD2Cl2.


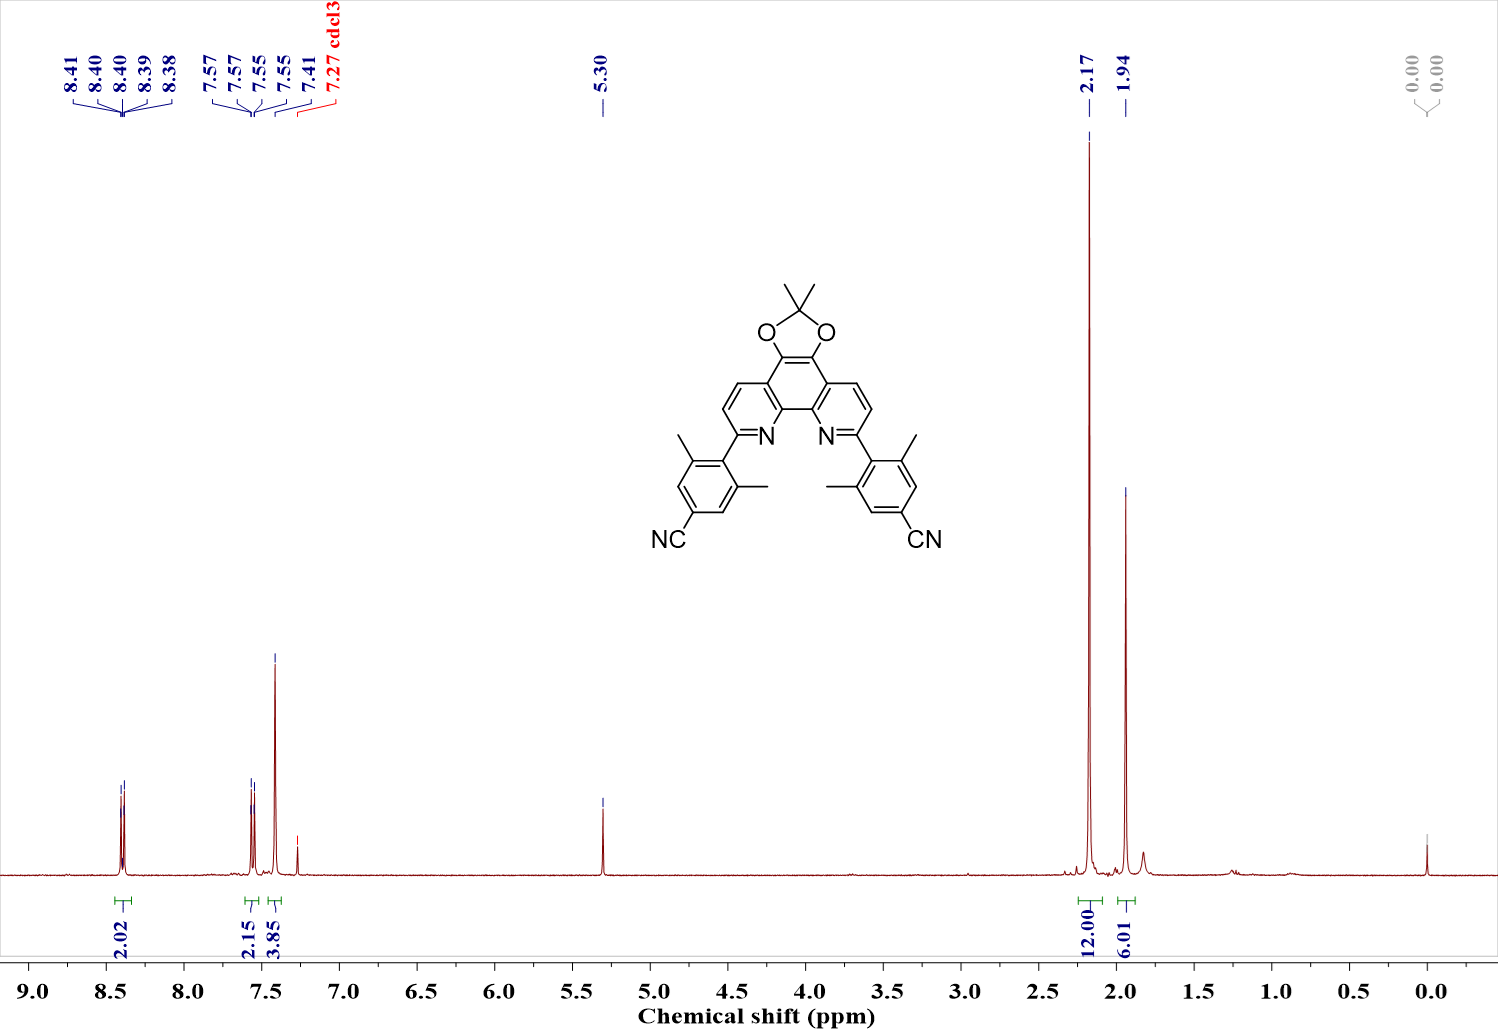


**Fig. S22.** 1H NMR spectra of intermediate 7 in CDCl3 (the peak at 5.30 ppm corresponds the residual dichloromethane).


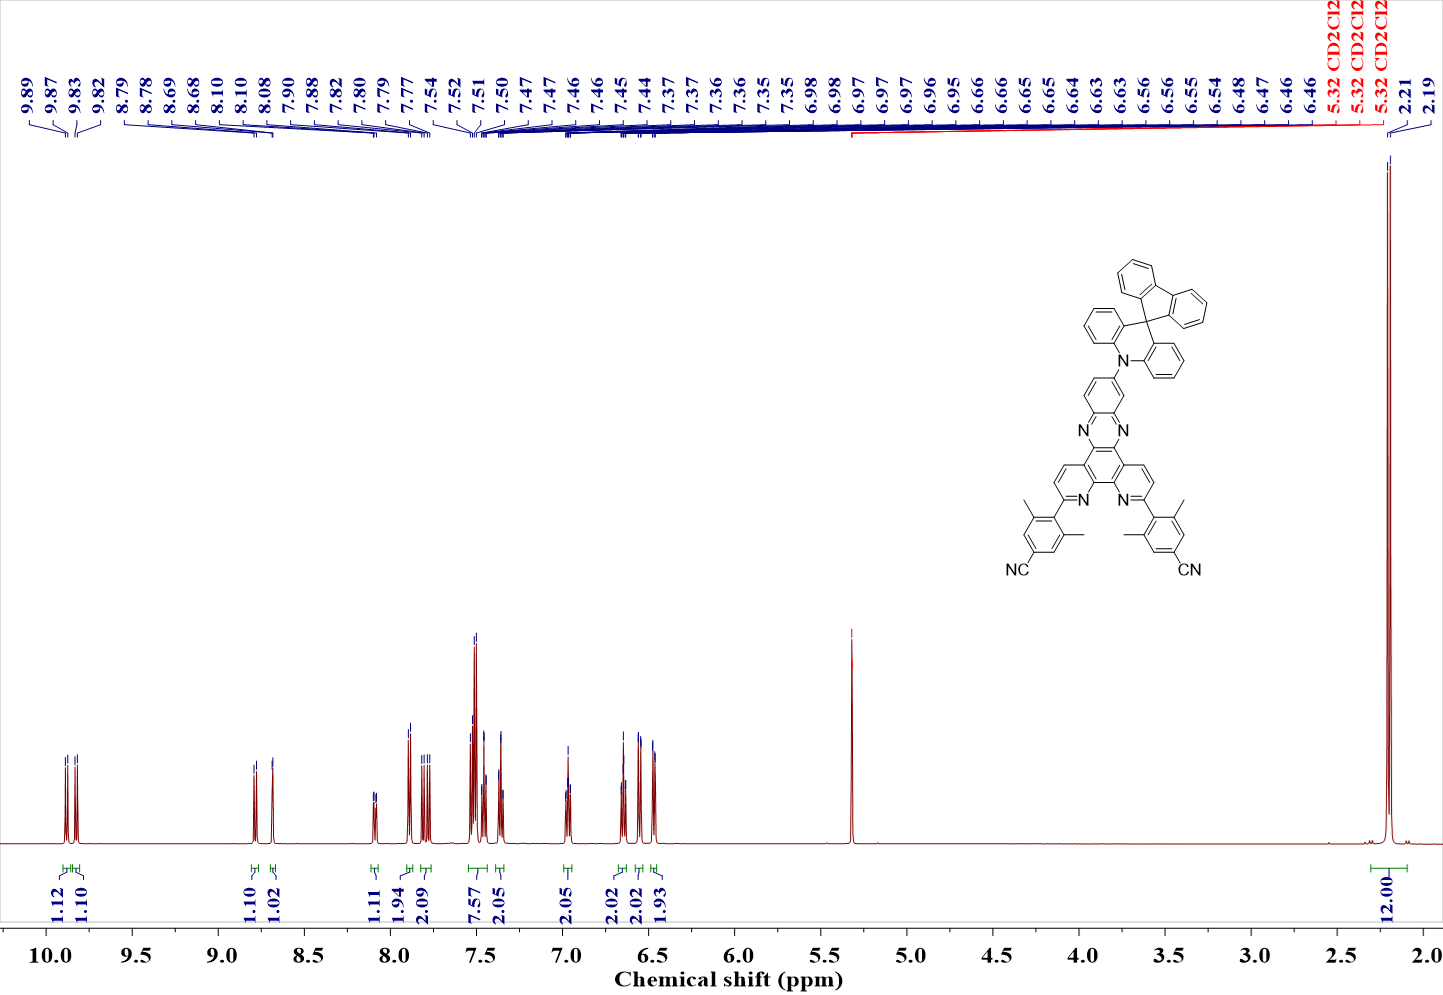


**Fig. S23.** 1H NMR spectra of SAF-36CNNP in CD2Cl2.


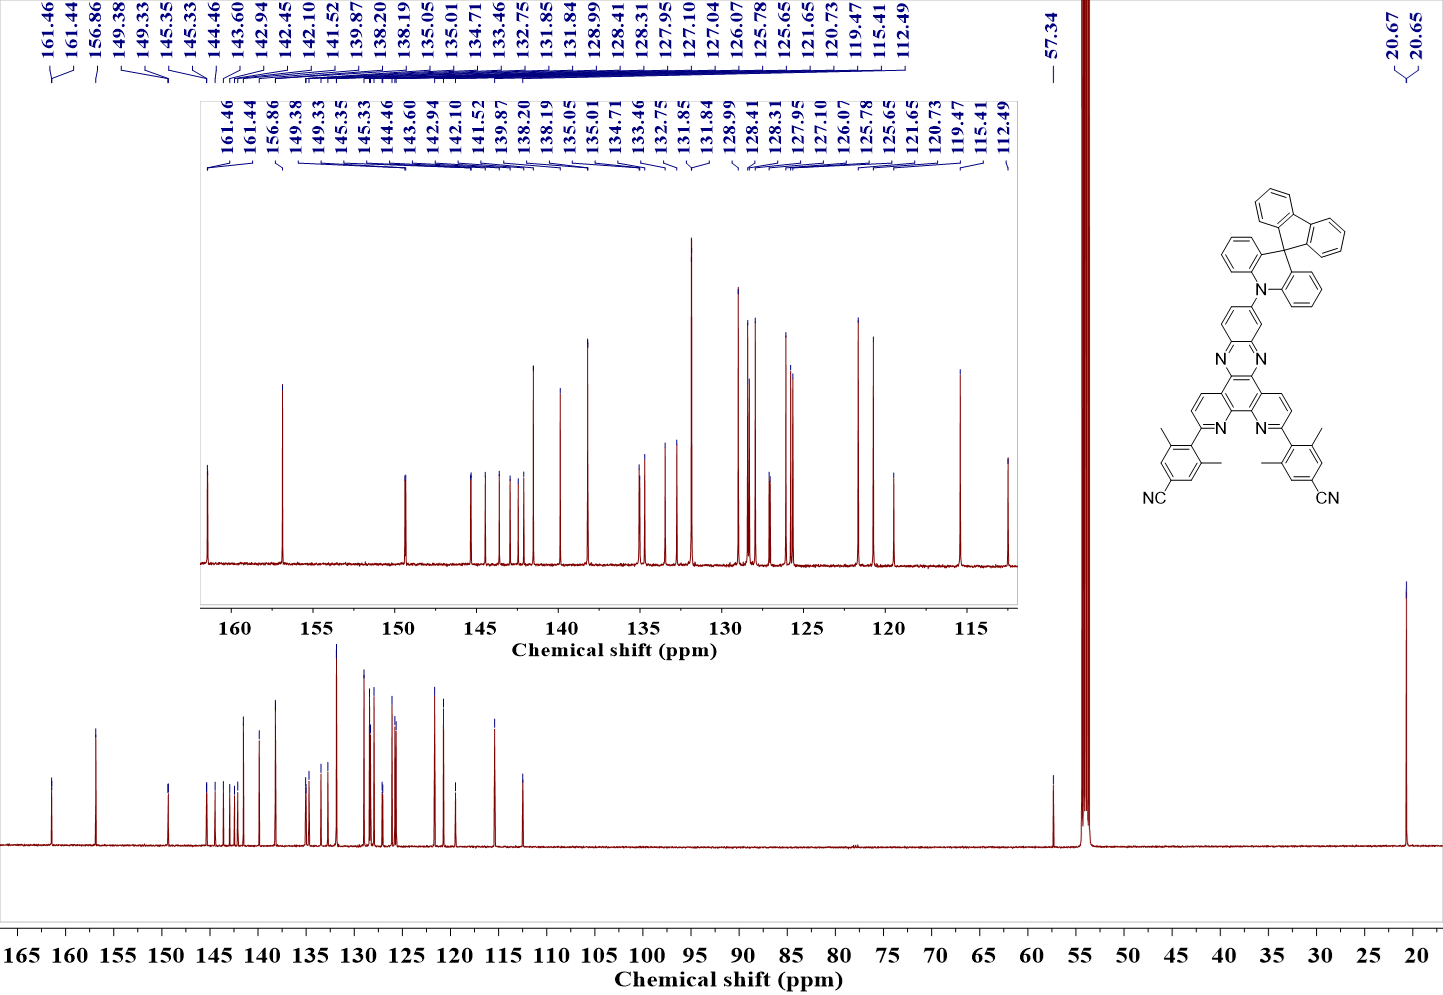


**Fig. S24.** 13C NMR spectra of SAF-36CNNP in CD2Cl2.


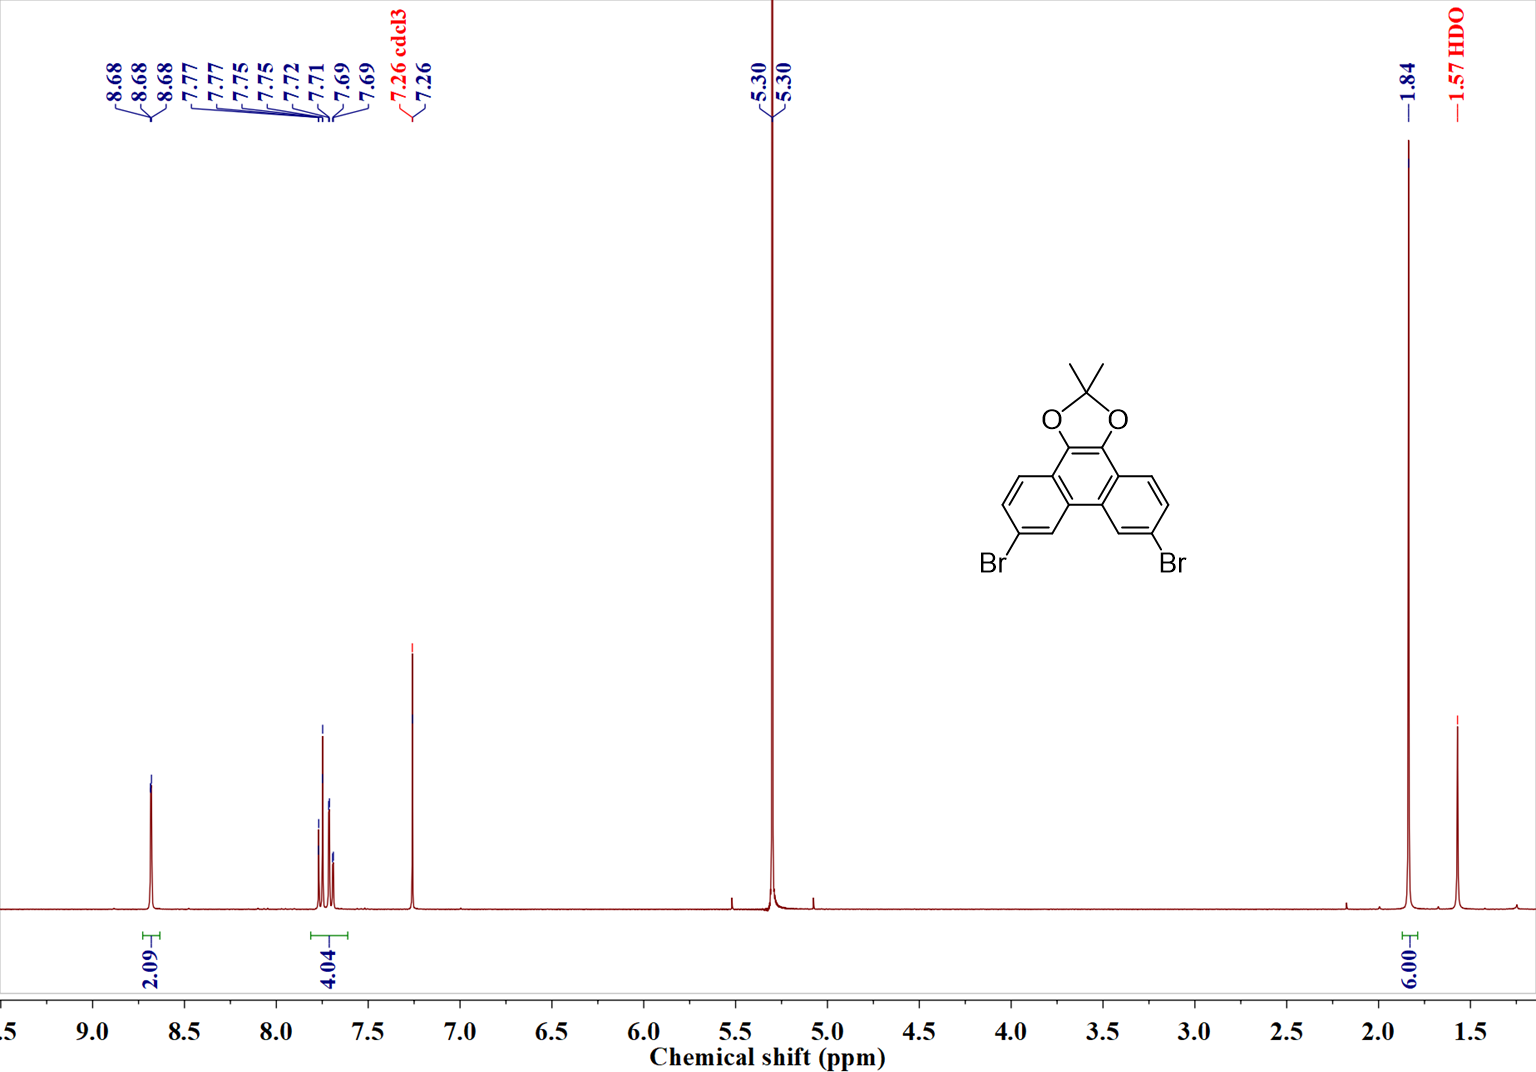


**Fig. S25.** 1H NMR spectra of intermediate 9 in CDCl3 (the peak at 5.30 ppm corresponds the residual dichloromethane).


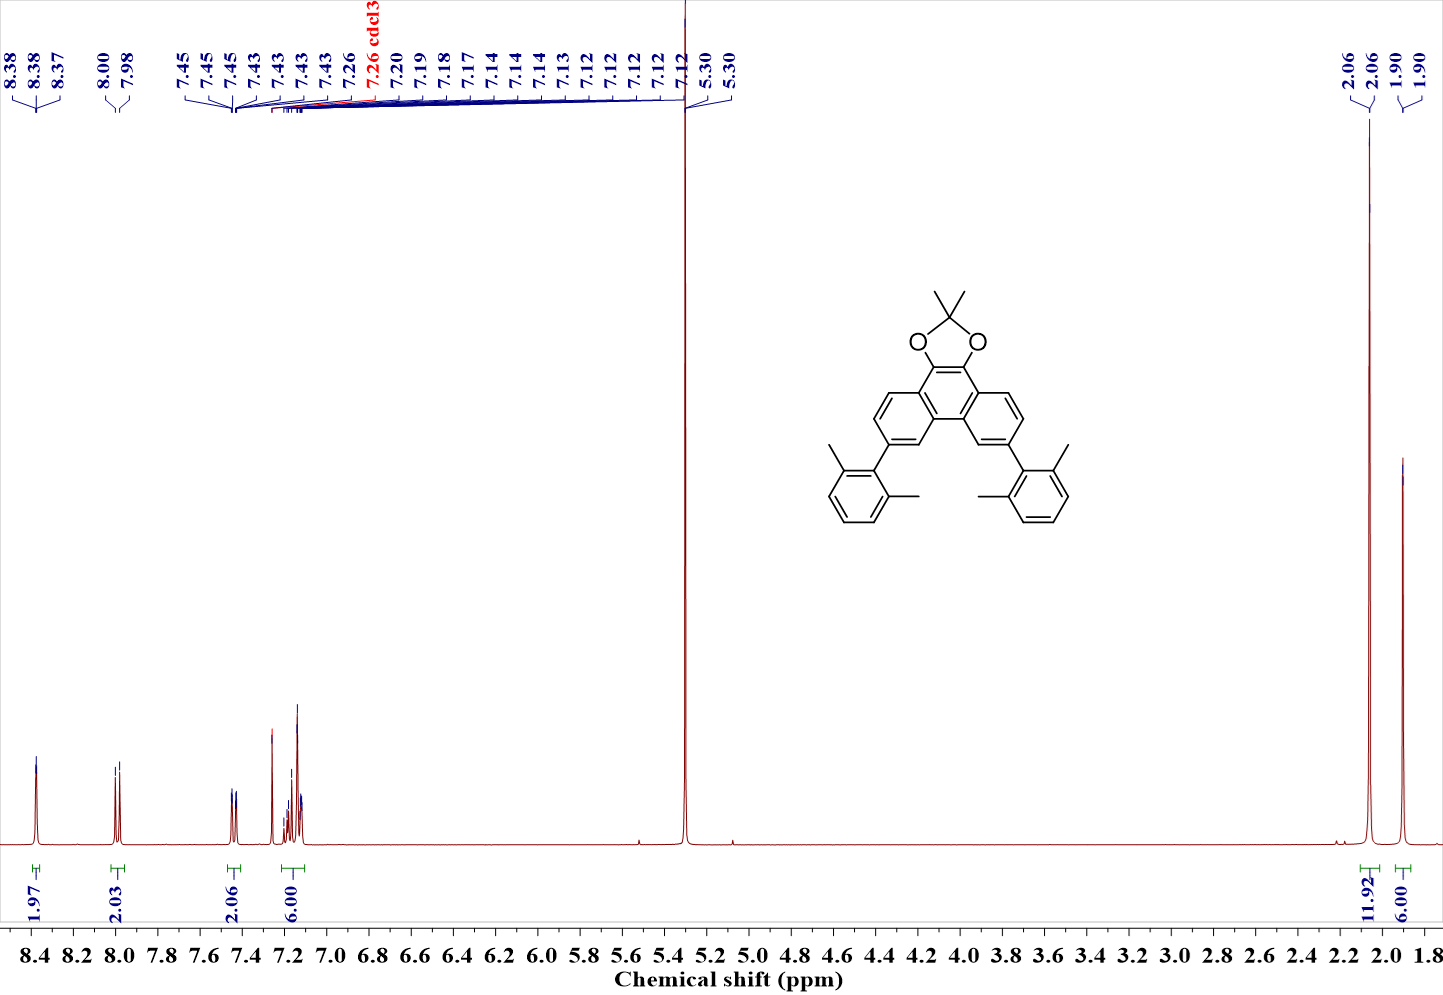


**Fig. S26.** 1H NMR spectra of intermediate 10 in CDCl3 (the peak at 5.30 ppm corresponds the residual dichloromethane).


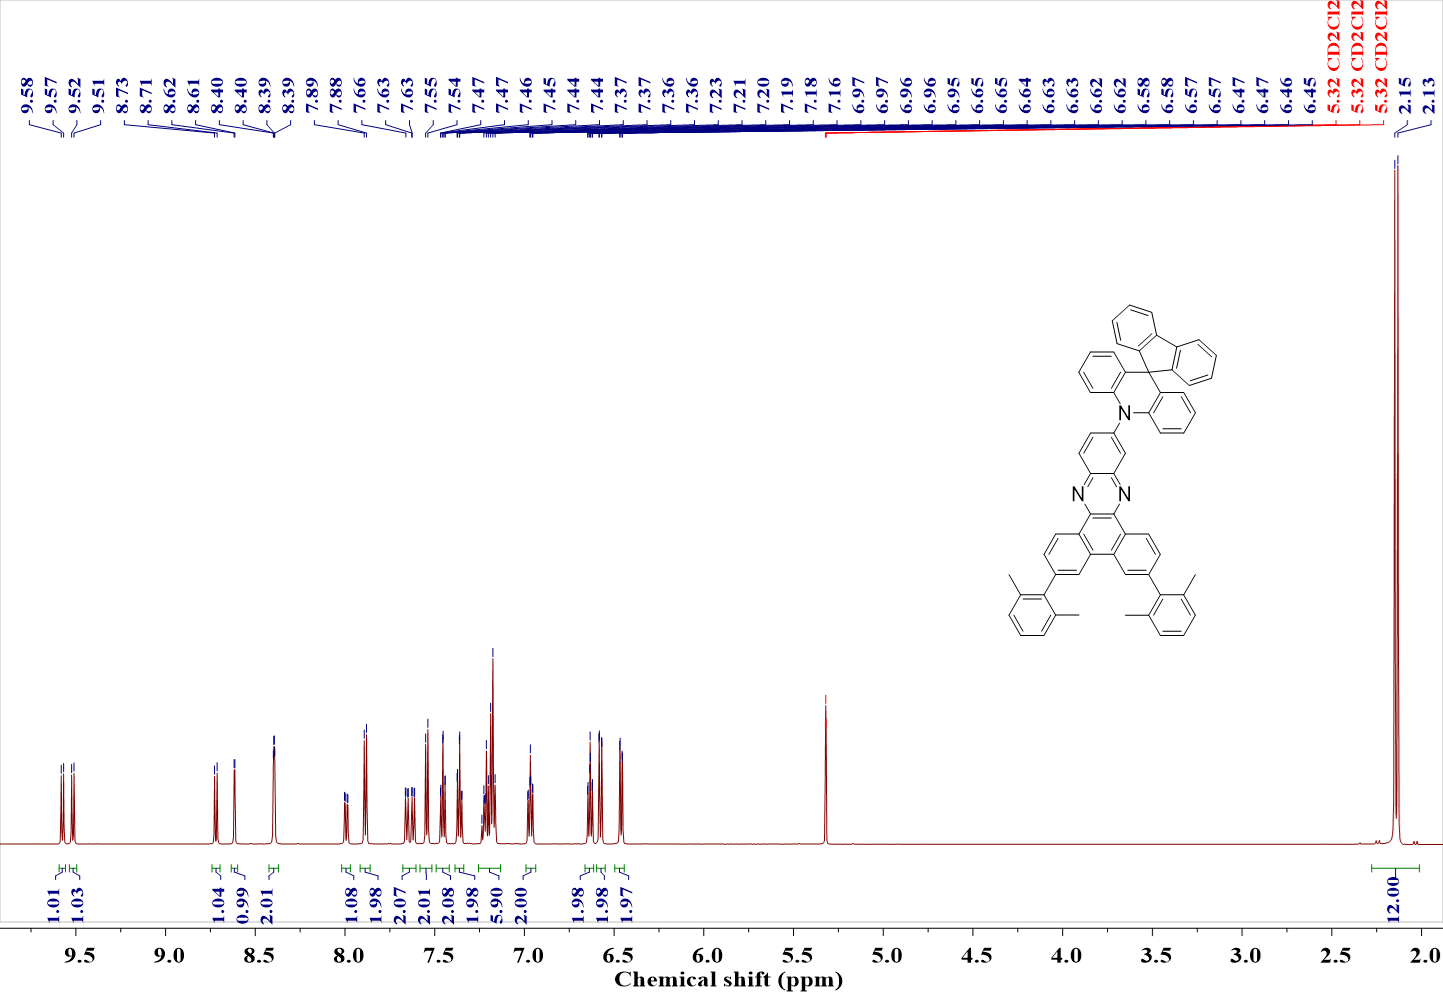


**Fig. S27.** 1H NMR spectra of SAF-36MXBP in CD2Cl2


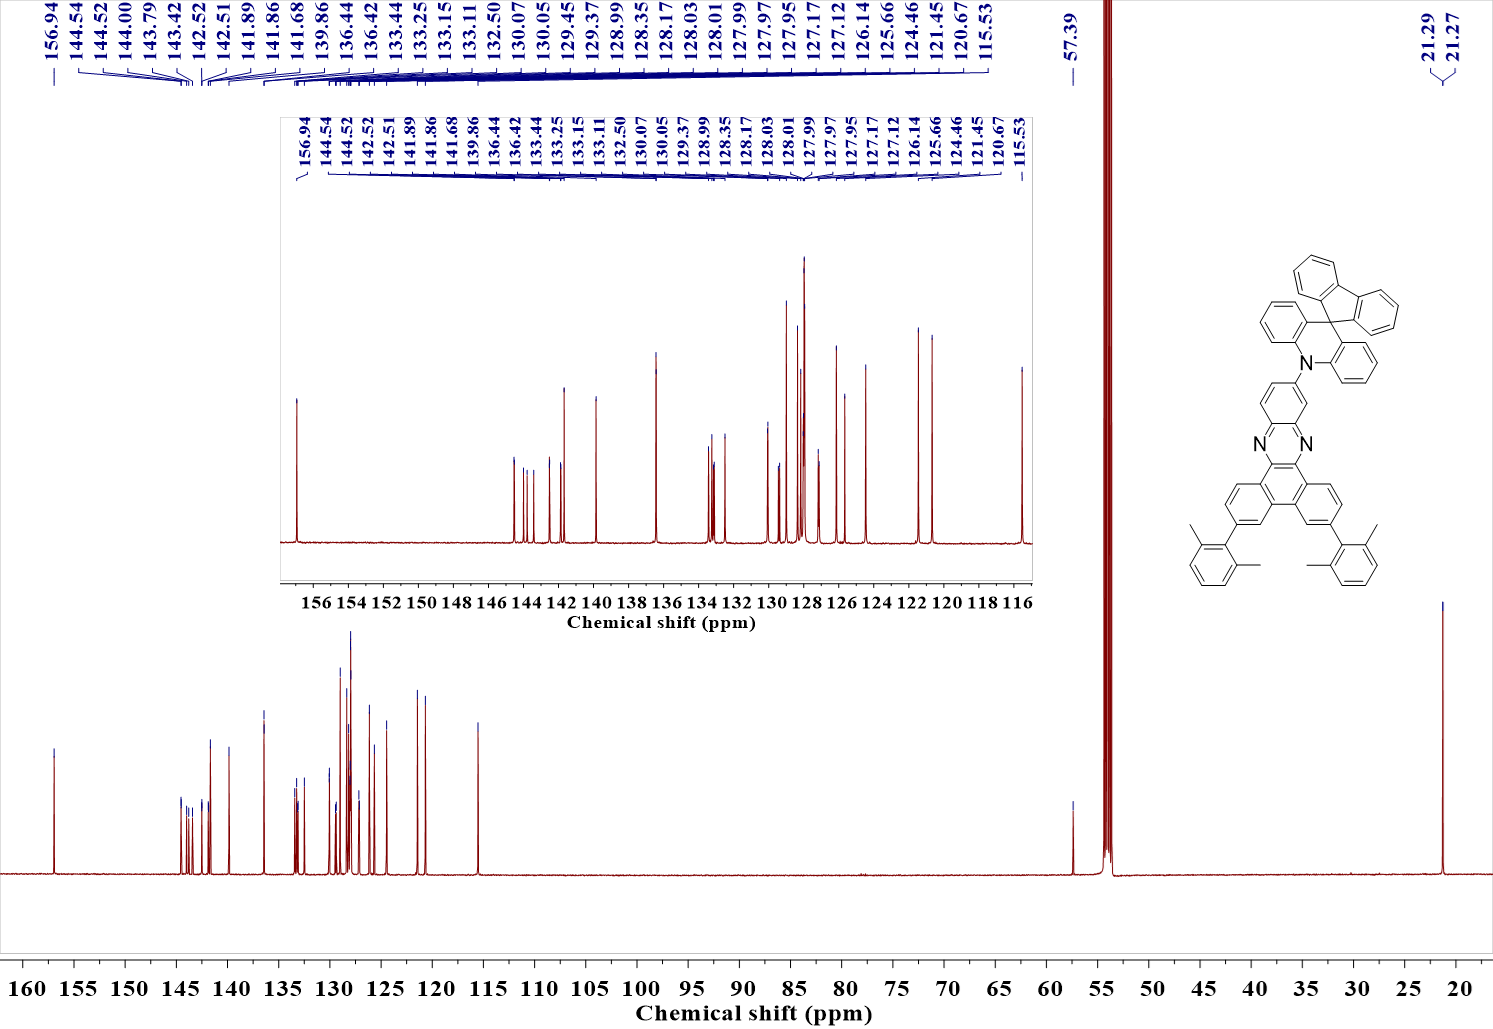


**Fig. S28.** 13C NMR spectra of SAF-36MXBP in CD2Cl2.

**Table S6.** X-ray crystallographic data of SAF-27MXNP.

| Temperature [K] | 150 |
| --- | --- |
| Crystal system | monoclinic |
| Space group | P21/n |
| *a* [Å] | 36.234(3) |
| *b* [Å] | 8.6361(7) |
| *c* [Å] | 36.862(3) |
| α [°] | 90 |
| β [°] | 117.064(5) |
| γ [°] | 90 |
| Volume [Å3] | 10271.7(16) |
| *Z* | 4 |
| *F*(000) | 3964 |
| Crystal colour | orange |
| Radiation | Cu*Kα* (λ=1.54178 Å) |
| Index ranges | −43 ≤ h ≤ 42 −10 ≤ k ≤ 8 −43 ≤ l ≤ 43 |
| Completeness to  θ = 67.14° | 98.5% |
| Data / Parameters | 18110/1461 |
| Goodness-of-fit on *F*2 | 0.9852 |
| Final *R* indexes  [*I*≥2σ(*I*)] | *R*1 = 0.0815 w*R*2 = 0.1966 |
| Final *R* indexes  [all data] | *R*1 = 0.1116 w*R*2 = 0.2148 |

**Table S7.** X-ray crystallographic data of SAF-36MXNP.

| Temperature [K] | 150 |
| --- | --- |
| Crystal system | monoclinic |
| Space group | P21/n |
| *a* [Å] | 36.234(3) |
| *b* [Å] | 8.6361(7) |
| *c* [Å] | 36.862(3) |
| α [°] | 90 |
| β [°] | 117.064(5) |
| γ [°] | 90 |
| Volume [Å3] | 10271.6(16) |
| *Z* | 4 |
| *F*(000) | 3964 |
| Crystal colour | orange |
| Radiation | Cu*Kα* (λ=1.54178 Å) |
| Index ranges | −43 ≤ h ≤ 42 −10 ≤ k ≤ 8 −43 ≤ l ≤ 43 |
| Completeness to  θ = 67.135° | 98.5% |
| Data/Parameters | 18110/1470 |
| Goodness-of-fit on *F*2 | 1.005 |
| Final *R* indexes  [*I*≥2σ(*I*)] | *R*1 = 0.0827 w*R*2 = 0.1995 |
| Final *R* indexes  [all data] | *R*1 = 0.1140 w*R*2 = 0.2186 |

**Table S8.** X-ray crystallographic data of SAF-36MXBP.

| Temperature [K] | 297 |
| --- | --- |
| Crystal system | monoclinic |
| Space group | C2/c |
| *a* [Å] | 37.6633(4) |
| *b* [Å] | 9.2281(1) |
| *c* [Å] | 26.2109(4) |
| α [°] | 90 |
| β [°] | 107.948(1) |
| γ [°] | 90 |
| Volume [Å3] | 8666.56(19) |
| *Z* | 8 |
| *F*(000) | 3440.0 |
| Crystal colour | orange |
| Radiation | Cu*Kα* (λ=1.54178 Å) |
| Index ranges | −40 ≤ h ≤ 47 −11 ≤ k ≤ 11 −33 ≤ l ≤ 32 |
| Completeness to  θ = 77.922° | 98.4% |
| Data/Parameters | 9131/581 |
| Goodness-of-fit on *F*2 | 1.051 |
| Final *R* indexes  [*I*≥2σ(*I*)] | *R*1 = 0.0731 w*R*2 = 0.2294 |
| Final *R* indexes  [all data] | *R*1 = 0.0686 w*R*2 = 0.2240 |

**Table S9.** X-ray crystallographic data of SAF-36CNNP.

| Temperature [K] | 295 |
| --- | --- |
| Crystal system | triclinic |
| Space group | P |
| *a* [Å] | 8.7528(1) |
| *b* [Å] | 14.7194(2) |
| *c* [Å] | 21.2500(3) |
| α [°] | 101.908(1) |
| β [°] | 96.141(1) |
| γ [°] | 95.227(1) |
| Volume [Å3] | 2645.39(6) |
| *Z* | 11 |
| *F*(000) | 1018.0 |
| Crystal colour | orange |
| Radiation | Cu*Kα* (λ=1.54178 Å) |
| Index ranges | −8 ≤ h ≤ 10 −18 ≤ k ≤ 18 −25 ≤ l ≤ 26 |
| Completeness to  θ = 77.837° | 94.0% |
| Data/Parameters | 10598/617 |
| Goodness-of-fit on *F*2 | 0.938 |
| Final *R* indexes  [*I*≥2σ(*I*)] | *R*1 = 0.0502 w*R*2 = 0.1564 |
| Final *R* indexes  [all data] | *R*1 = 0.0597 w*R*2 = 0.1666 |

**References**

1. Pellegrin, Y. *et al.* New Heteroleptic Bis-Phenanthroline Copper(I) Complexes with Dipyridophenazine or Imidazole Fused Phenanthroline Ligands: Spectral, Electrochemical, and Quantum Chemical Studies. *Inorg. Chem.* **50**, 11309–11322 (2011).

2. Zhang, H.-Y. *et al.* A novel orange-red thermally activated delayed fluorescence emitter with high molecular rigidity and planarity realizing 32.5% external quantum efficiency in organic light-emitting diodes. *Mater. Horiz.* **9**, 2425–2432 (2022).

3. Zeng, W. *et al.* Achieving Nearly 30% External Quantum Efficiency for Orange–Red Organic Light Emitting Diodes by Employing Thermally Activated Delayed Fluorescence Emitters Composed of 1,8-Naphthalimide-Acridine Hybrids. *Adv. Mater.* **30**, 1704961 (2018).

4. Karthik, D. *et al.* Acceptor–Donor–Acceptor-Type Orange–Red Thermally Activated Delayed Fluorescence Materials Realizing External Quantum Efficiency Over 30% with Low Efficiency Roll-Off. *Adv. Mater.* **33**, 2007724 (2021).

5. Cai, Z. *et al.* Realizing Record-High Electroluminescence Efficiency of 31.5 % for Red Thermally Activated Delayed Fluorescence Molecules. *Angew. Chem. Int. Ed.* **60**, 23635–23640 (2021).

6. Zhang, Y. *et al.* High‐Efficiency Red Organic Light‐Emitting Diodes with External Quantum Efficiency Close to 30% Based on a Novel Thermally Activated Delayed Fluorescence Emitter. *Adv. Mater.* **31**, 1902368 (2019).

7. Chen, J. *et al.* Red/Near‐Infrared Thermally Activated Delayed Fluorescence OLEDs with Near 100 % Internal Quantum Efficiency. *Angew. Chem. Int. Ed.* **58**, 14660–14665 (2019).

8. Hsieh, C.-M. *et al.* Diboron-Based Delayed Fluorescent Emitters with Orange-to-Red Emission and Superior Organic Light-Emitting Diode Efficiency. *ACS Appl. Mater. Interfaces* **12**, 23199–23206 (2020).

9. Wang, H. *et al.* An A-D-A-Type Thermally Activated Delayed Fluorescence Emitter with Intrinsic Yellow Emission Realizing Record-High Red/NIR OLEDs upon Modulating Intermolecular Aggregations. *Adv. Mater.* **36**, 2307725 (2024).

10. Cheng, Y.-C. *et al.* A Highly Twisted Carbazole-Fused DABNA Derivative as an Orange-Red TADF Emitter for OLEDs with Nearly 40 % EQE. *Angew. Chem. Int. Ed.* **61**, e202212575 (2022).

11. Chen, J. *et al.* Optimizing Intermolecular Interactions and Energy Level Alignments of Red TADF Emitters for High‐Performance Organic Light‐Emitting Diodes. *Small* **18**, 2201548 (2022).

12. Pu, Y. *et al.* Sulfur-locked multiple resonance emitters for high performance orange-red/deep-red OLEDs. *Nat. Commun.* **16**, 332 (2025).

13. Yang, W. *et al.* An Effective Approach toward Yellow-to-Orange Multi-Resonance TADF Emitters by Integrating Strong Electron Donor into B/N-Based Polycyclic Architecture: High Performance OLEDs with Nearly 40% EQE. *Adv. Funct. Mater.* **33**, 2213056 (2023).

14. Yang, M., Park, I. S. & Yasuda, T. Full-Color, Narrowband, and High-Efficiency Electroluminescence from Boron and Carbazole Embedded Polycyclic Heteroaromatics. *J. Am. Chem. Soc.* **142**, 19468–19472 (2020).

15. Luo, X.-F. *et al.* High-Efficiency and Narrowband OLEDs from Blue to Yellow with Ternary Boron/Nitrogen-Based Polycyclic Heteroaromatic Emitters. *Adv. Opt. Mater.* **10**, 2200504 (2022).

16. Huang, F. *et al.* Approaching Efficient and Narrow RGB Electroluminescence from D–A-Type TADF Emitters Containing an Identical Multiple Resonance Backbone as the Acceptor. *ACS Appl. Mater. Interfaces* **13**, 36089–36097 (2021).
